# Supplementary material
Source: PubMed Central journal article supplement (PMC7960562)
Supplement: NIHMS1655649-supplement-Supplementary_Material.pdf [file NIHMS1655649-supplement-Supplementary_Material.pdf]

# Supplementary Information

## **Benzene-associated immunosuppression and chronic inflammation in humans: A systematic review**

Helen Guo, Stacy Ahn, Luoping Zhang\*

Division of Environmental Health Sciences, School of Public Health, University of California Berkeley, Berkeley, USA

### **\*Corresponding author:**

Luoping Zhang, PhD  
Division of Environmental Health Sciences  
School of Public Health  
2121 Berkeley Way West, #5117  
Berkeley, CA 94720-7360  
Tel: (510) 643-5189  
Fax: (510) 642-0427  
Email: luoping@berkeley.edu

### **Table of Contents**

|                                                                                                                                                      |    |
|------------------------------------------------------------------------------------------------------------------------------------------------------|----|
| <b>Table S1.</b> The key characteristics of human carcinogens: evaluation of benzene.....                                                            | 3  |
| <b>Table S2.</b> Inclusion and exclusion criteria for study selection.....                                                                           | 4  |
| <b>Table S3.</b> Detailed summary of human benzene studies with inflammatory outcomes.....                                                           | 5  |
| <b>Table S4.</b> Detailed summary of human benzene studies with immunosuppressive outcomes.....                                                      | 11 |
| <b>Table S5.</b> Summary of additional studies identified from an updated search in July, 2020.....                                                  | 27 |
| <b>Table S6.</b> Major outcomes from benzene hematotoxicity studies in exposed people .....                                                          | 29 |
| <b>Benzene-Induced Hematotoxicity Outcomes</b> .....                                                                                                 | 33 |
| 1. White blood cells.....                                                                                                                            | 33 |
| 2. Platelets.....                                                                                                                                    | 33 |
| 3. Red blood cells.....                                                                                                                              | 34 |
| <b>Figure S1.</b> Summary of observed chronic inflammation, immunosuppression, and hematotoxicity outcomes in association with benzene exposure..... | 35 |
| <b>References</b> .....                                                                                                                              | 36 |

## Description

In the present systematic review, we utilized the ten key characteristics (KCs) of human carcinogens framework to identify and evaluate the mechanistic evidence for benzene, focusing on KC6: chronic inflammation and KC7: immunosuppression. The ten KCs are outlined in parallel with prior applications of the framework to benzene in **Supplementary Table 1**. We reviewed a total of *eighty-five* studies that reported on inflammatory or immunosuppressive effects in benzene-exposed populations.

**Supplementary Table 2** outlines our inclusion and exclusion criteria for study selection. Data extracted from 85 reviewed studies include the author, year published, country, study population and size, exposure assessment methods, level of exposure, and relevant outcomes. Detailed information for each individual study related to chronic inflammation (KC6) and immunosuppression (KC7) can be found in **Supplementary Tables 3 and 4**, respectively. An additional six studies identified from an updated search in July, 2020 are summarized in **Supplementary Table 5**. Additionally, a comprehensive summary of the hematotoxicity outcomes observed is detailed in **Supplementary Table 6**. Following the table, **Benzene-Induced Hematotoxicity Outcomes** is also described. These outcomes are detailed in the supplement rather than the main paper, since the hematotoxicity of benzene exposure has already been well-characterized in many prior studies. Finally, a summary of the major outcomes relating to chronic inflammation, immunosuppression, and hematotoxicity (overlapped with KC6 and KC7) can be found in **Supplementary Figure 1**.

**Note:** A comprehensive reference list for the supplement can be found at the end. All original studies reviewed (**Tables S3** and **S4**) are documented here due to the limited number of references we can cite in the main paper.

## Abbreviations

|             |                                    |
|-------------|------------------------------------|
| <b>AIDS</b> | Acquired immunodeficiency syndrome |
| <b>NK</b>   | Natural killer (cells)             |
| <b>RBC</b>  | Red blood cell                     |
| <b>WBC</b>  | White blood cell                   |

**Table S1.** The key characteristics of human carcinogens: evaluation of benzene. Modified from Smith *et al.*, 2016 (Table 1).[1]

| Key Characteristics | Relevant Evidence                                        | Benzene Evaluation                                                                                                                                                                |                |                    |                   |
|---------------------|----------------------------------------------------------|-----------------------------------------------------------------------------------------------------------------------------------------------------------------------------------|----------------|--------------------|-------------------|
|                     |                                                          | Smith <i>et al.</i> (2016)[1]                                                                                                                                                     | IARC (2018)[2] | Current Evaluation |                   |
| 1                   | Is electrophilic or can be metabolically activated       | Parent compound or metabolite with an electrophilic structure (e.g. epoxide, quinone, etc.), formation of DNA and protein adducts                                                 | Yes            | Yes                | N/A               |
| 2                   | Is genotoxic                                             | DNA damage (DNA strand breaks, DNA-protein cross-links, unscheduled DNA synthesis), intercalation, gene mutations, cytogenetic changes (e.g. chromosome aberrations, micronuclei) | Yes            | Yes                | N/A               |
| 3                   | Alters DNA repair or causes genomic instability          | Alterations of DNA replication or repair (e.g. topoisomerase II, base-excision or double-strand break repair)                                                                     | Yes            | Yes                | N/A               |
| 4                   | Induces epigenetic alterations                           | DNA methylation, histone modification, microRNAs                                                                                                                                  | Yes            | No                 | N/A               |
| 5                   | Induces oxidative stress                                 | Oxygen radicals, oxidative stress, oxidative damage to macromolecules (e.g. DNA, lipids)                                                                                          | Yes            | Yes                | N/A               |
| 6                   | <b>Induces chronic inflammation</b>                      | <b>Elevated WBCs, myeloperoxidase activity, altered cytokine and/or chemokine production</b>                                                                                      | <b>No</b>      | <b>No</b>          | <b>Suggestive</b> |
| 7                   | <b>Is immunosuppressive</b>                              | <b>Decreased immunosurveillance, immune system dysfunction</b>                                                                                                                    | <b>Yes</b>     | <b>Yes</b>         | <b>Yes</b>        |
| 8                   | Modulates receptor-mediated effects                      | Receptor in/activation (e.g. ER, PPAR, AhR) or modulation of endogenous ligands (including hormones)                                                                              | Yes            | Yes                | N/A               |
| 9                   | Causes immortalization                                   | Inhibition of senescence, cell transformation                                                                                                                                     | No             | No                 | N/A               |
| 10                  | Alters cell proliferation, cell death or nutrient supply | Increased proliferation, decreased apoptosis, changes in growth factors, energetics and signaling pathways related to cellular replication or cell-cycle control, angiogenesis    | Yes            | Yes                | N/A               |

Abbreviations: AhR, aryl hydrocarbon receptor; ER, estrogen receptor; IARC, International Agency for Research on Cancer; N/A, not applicable; PPAR, peroxisome proliferator-activated receptor; WBC, white blood cells.

**Table S2.** Inclusion and exclusion criteria for study selection.

|                           | <b>Types of Studies</b>                                                                                                                                                                                                                                                       | <b>Exposure</b>                                                                                                                                                                                                     | <b>Outcomes</b>                                                                                                                                                     |
|---------------------------|-------------------------------------------------------------------------------------------------------------------------------------------------------------------------------------------------------------------------------------------------------------------------------|---------------------------------------------------------------------------------------------------------------------------------------------------------------------------------------------------------------------|---------------------------------------------------------------------------------------------------------------------------------------------------------------------|
| <b>Inclusion Criteria</b> | <ul style="list-style-type: none"> <li>• Human studies that involve subjects of any age and any gender</li> <li>• Experimental animal studies (mammals only).</li> <li>• <i>In vitro</i> studies involving human cells</li> </ul>                                             | <ul style="list-style-type: none"> <li>• Any level of benzene exposure</li> <li>• For <i>in vitro</i> studies: exposure to benzene or 6 major benzene metabolites: benzene oxide, HQ, CAT, BT, MA, SPMA.</li> </ul> | <ul style="list-style-type: none"> <li>• Only studies that report immunosuppressive or chronic inflammatory outcomes or biomarkers will be included.</li> </ul>     |
| <b>Exclusion Criteria</b> | <ul style="list-style-type: none"> <li>• Any reviews</li> <li>• Letters, editorials, commentaries</li> <li>• Non-English language papers where reviewers don't have a means of translation</li> <li>• Any full-text articles that are not retrievable by reviewers</li> </ul> | <ul style="list-style-type: none"> <li>• Any studies that don't have any benzene exposure data or assessment</li> </ul>                                                                                             | <ul style="list-style-type: none"> <li>• Studies that do not record outcome data relevant to chronic inflammation or immunosuppression will be excluded.</li> </ul> |

Abbreviations: BT, 1,2,4-benzenetriol; CAT, catechol; HQ, hydroquinone; MA, E,E-muconic acid; SPMA, S-phenylmercapturic acid.

**Table S3.** Detailed summary of human benzene studies with inflammatory outcomes.

| Ref # | Reference (Author, Year) | Study Type      | Population                                             | Subject # (N)                                     | Location | Exposure Assessment                                                                                                                                   | Exposure Level                                                                                                                                                                                                                                                                            | Outcome                                                                                                                                                                    | Results                                                                                                                                                                                                               |
|-------|--------------------------|-----------------|--------------------------------------------------------|---------------------------------------------------|----------|-------------------------------------------------------------------------------------------------------------------------------------------------------|-------------------------------------------------------------------------------------------------------------------------------------------------------------------------------------------------------------------------------------------------------------------------------------------|----------------------------------------------------------------------------------------------------------------------------------------------------------------------------|-----------------------------------------------------------------------------------------------------------------------------------------------------------------------------------------------------------------------|
| [3]   | Bogadi-Sare, 1997        | Cross-sectional | Shoe factory workers                                   | N=76; 49 exposed, 27 unexposed                    |          | General air sampling, BZ in blood (before work shift and in the middle of the working week), phenol in urine (before and end of the same working day) | <b>General air sampling:</b> 5.9 (1.9-14.8) ppm<br><b>BZ in blood:</b><br>Exp: 0.005 mg/L<br>Ctrl: 0.000 mg/L<br><b>Phenol in pre-shift urine:</b><br>Exp: 3.840 mg/gCr creatinine<br>Ctrl: 2.197 mg/gCr<br><b>Phenol in post-shift urine:</b><br>Exp: 5.240 mg/gCr<br>Ctrl: 2.759 mg/gCr | <b>Hematological parameters:</b> CBC, Hb, HCT, MCV, MCH, MCHC, reticulocytes, serum iron, ALP in neutrophils, and GLT <sub>50</sub>                                        | ↑ band neutrophils, ↑ MCV, ↓ Hb, ↓ MCHC <sup>b</sup> , ↑ GLT <sub>50</sub> <sup>a</sup> , ↓ WBC <sup>a</sup> , ↓ segmented neutrophils <sup>a</sup> , ↓ lymphocytes <sup>a</sup>                                      |
| [4]   | Chen, 2019               | Cross-sectional | Residents near a petrochemical complex                 | N=421; 240 exposed, 181 unexposed                 | China    | Blood BZ levels                                                                                                                                       | Mean Exp Level<br><b>Non-smokers:</b><br>Exp: 41 ng/L<br>Ctrl: 15 ng/L<br><b>Smokers:</b><br>Exp: 49 ng/L<br>Ctrl: 14 ng/L                                                                                                                                                                | <b>Hematological parameters:</b> WBCs, neutrophils, lymphocytes, monocytes, eosinophils, basophils, RBCs, Hb, HCT, MCV, MCHC, platelets                                    | Correlated w/ t,t-MA: ↓ platelets, ↑ monocytes<br>All exposed: ↓ neutrophil, ↓ RBC, ↓ Hb, ↓ platelet, ↑ monocytes, ↑ basophils                                                                                        |
| [5]   | Doherty, 2017            | Cross-sectional | Adult residents of U.S. Gulf Coast (oil spill workers) | N=406                                             | U.S.A.   | Blood BTEX concentration                                                                                                                              | Geometric Mean<br><b>Exp:</b><br>Tobacco Smoke<br>Exp: 91 ng/L<br>Tobacco Smoke-Unexp: 25 ng/L<br><b>Ctrl:</b><br>Tobacco Smoke-Exp: 188 ng/L<br>Tobacco Smoke-Unexp: 22 ng/L                                                                                                             | <b>Hematological parameters:</b> RBC, Hb, HCT, MCHC, RDW, platelets, neutrophils, lymphocytes, monocytes, eosinophils                                                      | <b>Tobacco Smoke Unexp:</b><br>↓ Hb, ↓ MCHC; ↑ RDW<br><b>Tobacco Smoke Exp:</b><br>↑ RBC, ↑ WBC <sup>b</sup> , ↑ MCV, ↑ MCHC, ↑ neutrophils <sup>b</sup> , ↑ lymphocytes <sup>b</sup> , ↑ monocytes <sup>a</sup>      |
| [6]   | Dutta, 2013              | Cross-sectional | Premenopausal rural women                              | N=345; 196 biomass users, 149 petroleum gas users | India    | Urinary t,t-MA levels (PM <sub>10</sub> air measurements were also taken)                                                                             | <b>Exp:</b> 6.4 ± 4.3 mg/L (p < 0.05)<br><b>Ctrl:</b> 1.1 ± 0.7 mg/L                                                                                                                                                                                                                      | <b>Airway inflammation:</b> IL-6, IL-8, TNF-α<br><b>Sputum cytology</b><br><b>Oxidative stress:</b> ROS, SOD                                                               | <b>Cellular count:</b> ↑ total cell count <sup>b</sup> , ↑ neutrophils, ↑ eosinophils, ↑ lymphocytes, ↑ alveolar macrophages<br><b>Inflammation:</b> ↑ TNF-α <sup>b</sup> , ↑ IL-6 <sup>b</sup> , ↑ IL-8 <sup>b</sup> |
| [7]   | Elango, 2013             | Cross-sectional | Photocopier operators                                  | N=124; 81 exposed, 43 unexposed                   | India    | Air sampling of workplace (5 photocopy centers)                                                                                                       | <1.0 ug/m <sup>3</sup>                                                                                                                                                                                                                                                                    | <b>Pulmonary function</b><br><b>Hematological parameters</b><br><b>Oxidative stress + inflammation:</b> CRP, IL-8, LTB4, TBARS, FRAC, 8-isoprostane, CC-16, ICAM-1 and ECP | <b>Hematological:</b> ↑ HCT, ↑ MCV, ↑ RDW<br><b>Oxidative-Inflammatory Status:</b> ↑ serum protein, ↑ globulin, ↓ FRAC <sup>a</sup> , ↑ TBARS <sup>b</sup> , ↑ LTB4 <sup>b</sup> , ↑ ECP, ↑ IL-8 <sup>a</sup>         |

|      |                   |                 |                                |                                         |                 |                                                                                                                |                                                                                                                                                                                                                                                                            |                                                                             |                                                                                   |
|------|-------------------|-----------------|--------------------------------|-----------------------------------------|-----------------|----------------------------------------------------------------------------------------------------------------|----------------------------------------------------------------------------------------------------------------------------------------------------------------------------------------------------------------------------------------------------------------------------|-----------------------------------------------------------------------------|-----------------------------------------------------------------------------------|
| [8]  | Fenga, 2016       | Cross-sectional | Gas station workers            | N=154; 91 exposed, 63 unexposed         | Italy           | Urinary t,t-MA levels                                                                                          | <b>Exp:</b> 0.89 ± 0.57 ug/ml<br><b>Ctrl:</b> 0.67 ± 0.45 ug/ml                                                                                                                                                                                                            | NF-kB, STAT3, p38-MAPK, SAPK./JNK signal transduction                       | ↑ NF-kB, phospho-IkB-α proteins <sup>b</sup> ↓ pSTAT3 <sup>b</sup>                |
| [9]  | Forrest, 2005     | Cross-sectional | Shoe factory workers           | N=12; 6 highly exposed workers, 6 ctrls | China (Tianjin) | Personal passive monitoring                                                                                    | 47.3 ± 24.3 ppm                                                                                                                                                                                                                                                            | Global gene expression                                                      | ↑ <i>CXCL16</i> , ↑ <i>ZNF33</i> , ↓ <i>JUN</i> , ↓ <i>PF4</i>                    |
| [10] | Haro-Garcia, 2012 | Cross-sectional | Paint company workers          | N=54; 24 high exposed, 30 low exposed   | Mexico          | Personal BTX sampling, urinary SPMA levels                                                                     | <b>High:</b> 14.4 (3.2-16.3) mg/m <sup>3</sup> TWA<br><b>Low:</b> 3.2 (1.6-15.4) mg/m <sup>3</sup> TWA<br><b>High:</b> 3.4 ± 1.8 umol/molCr<br><b>Low:</b> 2.4 ± 1.0 umol/molCr                                                                                            | <b>Cytokine production:</b> IL-10, TNF-α, IL-12 production                  | ↓ TNF-α <sup>a</sup> , ↓ aggregate production of all three cytokines <sup>a</sup> |
| [11] | Hotz, 1998        | Cross-sectional | Mechanics                      | N=307; 199 exposed, 108 unexposed       |                 | Questionnaire; general workplace sampling (TWA during whole workshift)                                         | <1.14 ppm                                                                                                                                                                                                                                                                  | Hematological parameters; IL-1α production                                  | No significant change in IL-1α production and in hematological parameters         |
| [12] | Ibrahim, 2014     | Cross-sectional | Ceramic factory workers        | N=164; 81 exposed, 83 unexposed         | Egypt           | Urinary t,t-MA levels                                                                                          | <b>Exp:</b> 0.22 ± 0.48 mg/gCr<br><b>Ctrl:</b> 0.043 ± 0.008 mg/gCr                                                                                                                                                                                                        | <b>Hematological parameters:</b> WBCs, RBCs, Hb, HCT, MCV, MCH, MCHC        | ↓ WBC, ↓ RBCs, ↓ Hb <sup>b</sup> , ↑ MCV <sup>a</sup> , ↓ platelets               |
| [13] | Jorgensen, 2018   | Cross-sectional | Tank workers                   | N=13; 8 exposed, 5 unexposed            | Norway          | Personal BTEX air monitoring (3 consecutive 12-h work shifts), BZ in blood, BZ in urine, urinary t,t-MA levels | Raw values<br><b>Air:</b><br>Exp: 0.21 ± 0.17 ppm<br><b>Blood:</b><br>Exp: 19.3 ± 12 nmol/L<br>Ctrl: 0.9 ± 0.2 ± nmol/L<br><b>Urine BZ:</b><br>Exp: 71.3 ± 110 nmol/L<br>Ctrl: 1.1 ± 0.8 nmol/L<br><b>Urine t,t-MA:</b><br>Exp: 4.2 ± 4.1 umol/L<br>Ctrl: 2.6 ± 1.5 umol/L | <b>Gene expression</b>                                                      | ↑ IL-6, ↓ IL-19; ↓ CLEC5, ↓ PRG2; ↑ ACSL1, ↑ IFNB1                                |
| [14] | Lehmann, 2001     | Cohort          | 3 year old children            | N=200                                   | Germany         | Indoor VOC exposure measured with bedroom air sampling                                                         | N/A                                                                                                                                                                                                                                                                        | Prevalence of allergic sensitization; cytokine secretion profile of T cells | ↑ percentage of IL-4 producing CD3+ T cells                                       |
| [15] | Li, 2009a         | Cross-sectional | Occupationally exposed workers | N=165; 138 exposed, 27 unexposed        | China           | Workplace air sampling or diagnosis of BZ poisoning                                                            | 37.8 mg/m <sup>3</sup>                                                                                                                                                                                                                                                     | TRECs levels                                                                | ↓ TRECs, ↓ WBCs, ↓ Hb, ↓ platelets, ↓ RBCs                                        |

|      |                        |                 |                                                     |                                                                                      |                 |                                                                    |                                                                                                                                                                                             |                                                                                               |                                                                                                                                                                                                                                                                                                                                                                              |
|------|------------------------|-----------------|-----------------------------------------------------|--------------------------------------------------------------------------------------|-----------------|--------------------------------------------------------------------|---------------------------------------------------------------------------------------------------------------------------------------------------------------------------------------------|-----------------------------------------------------------------------------------------------|------------------------------------------------------------------------------------------------------------------------------------------------------------------------------------------------------------------------------------------------------------------------------------------------------------------------------------------------------------------------------|
| [16] | Liang, 2018            | Cross-sectional | Petrochemical plant workers                         | N=1064; 532 exposed, 532 unexposed                                                   | China           | General workplace air sampling (TWA)                               | <b>Low exposure:</b> 0.006 ppm<br><b>High exposure:</b> 0.035 ppm<br><b>Ctrl:</b> <0.006 ppm                                                                                                | Serum protein levels of PLG, PBP, ApoB100, hematological parameters                           | ↑ in serum PLG levels (dose-response); no significant changes in serum PBP or ApoB100, ↑ RBC,                                                                                                                                                                                                                                                                                |
| [17] | McHale, 2009           | Cross-sectional | Shoe factory workers                                | N=16; 8 exposed, 8 unexposed                                                         | China (Tianjin) | Personal passive monitoring                                        | 47.3 ± 24.3 ppm                                                                                                                                                                             | Global gene expression                                                                        | ↑ <i>CXCL16</i> , ↑ <i>ZNF331</i> , ↓ <i>JUN</i> , ↓ <i>PF4</i>                                                                                                                                                                                                                                                                                                              |
| [18] | McHale, 2011           | Cross-sectional | Clothes manufacturing workers                       | N=125; 83 exposed, 42 unexposed                                                      | China (Tianjin) | Individual air benzene measurements                                | >10 ppm, 5-10 ppm, <1 ppm, <<1 ppm                                                                                                                                                          | Global gene expression                                                                        | ↑ B-cell receptor signaling, Affected genes: <i>SERPINB2</i> , <i>TNFAIP6</i> , <i>IL1A</i> , <i>KCNJ2</i> , <i>PTX3</i> , <i>F3</i> , <i>CD44</i> , <i>CCL20</i> , <i>ACSL1</i> , <i>PTGS2</i> , <i>CLEC5A</i> , <i>IL1RN</i> , <i>PRG2</i> , <i>SLC2A6</i> , <i>GPR132</i> , <i>PLAUR</i>                                                                                  |
| [19] | Moro, 2015             | Cross-sectional | Gas station attendants                              | N=88; 60 exposed, 28 unexposed                                                       | Brazil          | Personal passive samplers, blood BTX levels, urinary t,t-MA levels | <b>Exp:</b><br>Air: 144.2 (58.1-2207.5) ug/m <sup>3</sup><br>Urinary: 334 (190-600) ug/gCr<br><b>Unexp:</b><br>Air: 42.0 (34.1-52.4) ug/m <sup>3</sup><br>Urinary: 70.0 (50.0-120.0) ug/gCr | Hematological parameters, ALA-D activity, CD80 + CD86 expression, IL-8                        | ↓ ALA-D activity <sup>b</sup> , ↓ CD80 + CD86 expression <sup>a</sup> , ↑ IL-8 <sup>b</sup> , ↑ neutrophils                                                                                                                                                                                                                                                                  |
| [20] | Pelallo-Martinez, 2014 | Cross-sectional | Children living near petrochemical area             | N=105; 46 Allende, 38 Mundo Nuevo, 21 Lopez Mateos (all exposed)                     | Mexico          | Urinary t,t-MA levels                                              | Mean (range)<br><b>Allende:</b> 388 (44-1784) ug/gCr<br><b>Mundo Nuevo:</b> 363 (63-5521) ug/gCr<br><b>Lopez Mateos:</b> 369 (62-1414) ug/g Cr                                              | <b>Genotoxicity:</b> DNA damage<br><b>Hematological effects:</b> WBC, Hb, HCT, RBC, platelets | <b>Lopez Mateos:</b> ↓ Hb <sup>a</sup> , ↓ HCT <sup>a</sup> , ↓ WBC, ↓ RBC                                                                                                                                                                                                                                                                                                   |
| [21] | Qu, 2002               | Cross-sectional | Factory workers (glue, shoe-making, sporting goods) | N=181; 130 exposed, 51 unexposed                                                     | China (Tianjin) | Individual passive monitoring                                      | Median (range) = 3.2 (0.06-122) ppm daily                                                                                                                                                   | <b>Blood parameters:</b> RBC, platelets, WBC, neutrophils, lymphocytes, eosinophils, etc.     | Exposure-dependent: ↓ RBC <sup>b</sup> , ↓ WBC <sup>b</sup> , ↓ neutrophils <sup>b</sup>                                                                                                                                                                                                                                                                                     |
| [22] | Ray, 2007              | Cross-sectional | Petrol pump or automobile service workers           | N=85; 25 petrol pump attendants, 25 automobile service station workers, 35 unexposed | India           | Urinary t,t-MA levels                                              | <b>Exp:</b> 2.72 ± 0.21 mg of t,t-MA/L<br><b>Unexp:</b> 0.71 ± 0.11 mg/L                                                                                                                    | Hematological parameters and lymphocyte subsets                                               | <b>Hematological parameters:</b> ↓ RBC, ↓ Hb, ↓ lymphocyte, ↓ platelets, ↑ MCV, ↑ eosinophils, ↑ monocytes, ↑ immature neutrophil, ↑ band cells, ↑ RBC aniso-poikilocytosis, ↑ target cells, ↑ giant platelets<br><b>Lymphocyte subsets:</b> ↓ CD4+, ↓ CD8+, ↓ CD19+ cells, ↑ CD16+56+ NK cells<br><b>P-selectin expression on platelet surface:</b> ↑ P-selectin expression |

|      |                 |                 |                                                      |                                                       |       |                                                                                                                                                                    |                                                                                                                                                                                                                                                                                                                                |                                                                                                                                                                                                    |                                                                                                                                                                                                                                                                                                                                                                                                                                   |
|------|-----------------|-----------------|------------------------------------------------------|-------------------------------------------------------|-------|--------------------------------------------------------------------------------------------------------------------------------------------------------------------|--------------------------------------------------------------------------------------------------------------------------------------------------------------------------------------------------------------------------------------------------------------------------------------------------------------------------------|----------------------------------------------------------------------------------------------------------------------------------------------------------------------------------------------------|-----------------------------------------------------------------------------------------------------------------------------------------------------------------------------------------------------------------------------------------------------------------------------------------------------------------------------------------------------------------------------------------------------------------------------------|
| [23] | Rothman, 1996a  | Cross-sectional | Occupational factory workers                         | N=88; 44 exposed, 44 unexposed                        | China | Organic vapor passive dosimetry badge (worn for a full workshift, 5 days during 1 or 2 weeks before phelobotomy), BZ urinary metabolites (t,t-MA, phenol, CAT, HQ) | Median 8-hr TWA = 31 ppm<br><b>Urinary:</b><br>Exp:<br><31ppm:<br>ttMA: 8.15 ug/mg<br>CAT: 7.0 ug/mg<br>HQ: 12.8 ug/mg<br>Phenol: 38.9 ug/mg<br>>31ppm:<br>ttMA: 46.8 ug/mg<br>CAT: 65.7 ug/mg<br>HQ: 64.3 ug/mg<br>Phenol: 349.7 ug/mg<br>Unexp:<br>ttMA: 0.18 ug/mg<br>CAT: 3.2 ug/mg<br>HQ: 1.6 ug/mg<br>Phenol: 17.3 ug/mg | <b>Hematological parameters:</b> WBC, lymphocyte, Hb, RBC, platelet, MCV, HCT                                                                                                                      | ↓ WBC, ↓ lymphocyte count <sup>a</sup> , ↓ platelets <sup>a</sup> , ↓ RBCs; ↑ MCV                                                                                                                                                                                                                                                                                                                                                 |
| [24] | Rothman, 1996b  | Cross-sectional | Occupational factory workers                         | N=88; 44 exposed, 44 unexposed                        | China | Organic vapor passive dosimetry badge (worn for a full workshift, 5 days during 1 or 2 weeks before phelobotomy), BZ urinary metabolites (t,t-MA, phenol, CAT, HQ) | Median 8-hr TWA = 31 ppm<br><b>Urinary:</b><br>Exposed:<br>MA: 33.0 ug/mg<br>Unexposed:<br>MA: 0.3 ug/mg                                                                                                                                                                                                                       | <b>Hematological parameters:</b> WBC, lymphocyte, Hb, RBC, platelet, MCV, HCT<br><b>Cytokine Levels:</b> GM-CSF, IL-6, EPO, TNF- $\alpha$ , IL-3                                                   | ↓ WBC, lymphocyte count, platelets, RBCs, HCT; ↑ MCV; no significant difference in cytokine values (IL-3, IL-6, EPO, GM-CSF, TNF- $\alpha$ )                                                                                                                                                                                                                                                                                      |
| [25] | Samadi, 2019    | Cross-sectional | Adults exposed to an urban environment               | N=219; 74 industrial, 74 high traffic, 71 low traffic | Iran  | BTXS air sampling of industrial (28), high traffic (33), and low traffic areas (32) twice a day; Total: 18 stations, 93 air samples                                | <b>Industrial:</b> 15.92 $\pm$ 8.15 ug/m <sup>3</sup><br><b>High traffic:</b> 7.33 $\pm$ 5.97 ug/m <sup>3</sup><br><b>Low traffic:</b> 2.08 $\pm$ 1.15 ug/m <sup>3</sup>                                                                                                                                                       | <b>Hematologic parameters:</b> WBC: neutrophils, eosinophils, monocytes, basophils, lymphocytes; RBC, Hb, HCT, MCV, MCHC, MCH<br><b>Pro-inflammatory biomarkers:</b> TNF- $\alpha$ , IFN- $\gamma$ | <b>Btwn industrial and low traffic area groups:</b><br>↓ RBCs <sup>b</sup> , ↓ Hb, ↓ HCT <sup>a</sup> , ↑ WBC, ↑ neutrophils <sup>a</sup> , ↓ eosinophils, ↑ TNF- $\alpha$ <sup>a</sup> , ↑ IFN- $\gamma$ <sup>a</sup><br><b>Btwn high and low traffic:</b><br>↓ RBCs, ↑ TNF- $\alpha$ <sup>a</sup> , ↑ IFN- $\gamma$ <sup>a</sup><br><b>Btwn industrial and high traffic:</b> ↑ MCHC <sup>a</sup> , ↑ neutrophils, ↓ eosinophils |
| [26] | Schnatter, 2010 | Cross-sectional | Factory workers (rubber, shoe, insulation materials) | N=928; 855 exposed, 73 unexposed                      | China | Individual monitoring of a random sample of workers                                                                                                                | Median (range) = 7.4 (0.07-872) mg/m <sup>3</sup>                                                                                                                                                                                                                                                                              | <b>Hematological parameters:</b> WBCs, neutrophils, basophils, eosinophils, monocytes, lymphocytes, RBCs, Hb, MCV, RDW, platelets, MPV<br><b>SNPs:</b> NQO1, MPO, CYP2E1, GSTT1                    | ↓ WBCs <sup>a</sup> , ↓ lymphocytes, ↓ monocytes, ↓ neutrophils, ↓ RBCs <sup>b</sup> , ↓ Hb <sup>b</sup> , ↓ MCV <sup>b</sup> , ↓ platelets <sup>a</sup> , ↓ MPV <sup>c</sup>                                                                                                                                                                                                                                                     |



|      |                |                                                   |                                            |                                                            |       |                                                         |                                                                                                |                                                                                                                                                         |                                                                                                                                                                                                                                                                                                      |
|------|----------------|---------------------------------------------------|--------------------------------------------|------------------------------------------------------------|-------|---------------------------------------------------------|------------------------------------------------------------------------------------------------|---------------------------------------------------------------------------------------------------------------------------------------------------------|------------------------------------------------------------------------------------------------------------------------------------------------------------------------------------------------------------------------------------------------------------------------------------------------------|
| [27] | Townsend, 1978 | Cross-sectional                                   | Employees                                  | N=282; all exposed                                         | N/A   | TWA estimates of BZ based on environmental measurements | <b>Range:</b> <2 ppm TWA - 30 ppm TWA for periods of <1 yr - 20 yrs+                           | <b>Blood chemistries:</b> bilirubin, Cr, total protein, albumin, globulin, BUN, LDH, SGOT<br><b>Blood parameters:</b> HCT, Hb, WBC, RBC, MCV, MCH, MCHC | ↓ RBC, ↓ bilirubin                                                                                                                                                                                                                                                                                   |
| [28] | Uzma, 2008     | Cross-sectional                                   | Petrol filling workers                     | N=78; 42 exposed, 36 unexposed                             | India | Proxy (occupation)                                      |                                                                                                | Respiratory, hematological, and thyroid functions                                                                                                       | <b>Hematological</b> ↑ RBCs and ↑ Hb (10-15, >15 yrs of exposure), ↓ WBC (except eosinophils and platelets - ↑ observed in eosinophil count according to yrs of exposure)<br><b>Thyroid:</b> ↑ T4, ↑ T4F level, ↓ TSH, ↓ T3<br><b>Respiratory:</b> ↓ VC, ↓ FVC, ↓ IC, ↓ FIVC (<10 years of exposure) |
| [29] | Ward, 1996     | Retrospective cohort (nested case-control design) | Rubber hydrochloride manufacturing workers | N=657 (all exposed)                                        |       | Proxy (occupation)                                      | Max daily BZ exposure = 34 ppm                                                                 | <b>Blood cell count:</b> WBC, RBC                                                                                                                       | ↓ WBCs (strong exposure-response); ↓ RBCs (weak exposure-response)                                                                                                                                                                                                                                   |
| [30] | Yang, 2014     | Cross-sectional                                   | Paint sprayers                             | N=8; 4 exposed, 4 unexposed                                | China | General air sampling                                    | <b>BZ-exposed:</b> 6.68 ± 2.28 mg/m <sup>3</sup><br><b>Ctrl:</b> 0.06 ± 0.01 mg/m <sup>3</sup> | Genome-wide DNA methylation; mRNA expression                                                                                                            | Hypermethylated genes with concurrent mRNA down-regulation: PRKG1, PARD3, EPHA8<br>Hypomethylated genes with concurrent mRNA down-regulation: STAT3, IFNGR1                                                                                                                                          |
| [31] | Zhang, 2018    | Cross-sectional                                   | Chronic BZ poisoning patients              | N=165; 90 normal, 53 mild, 8 moderate, 14 severe poisoning | China | Proxy (BZ poisoned patients)                            |                                                                                                | Serum proteins that can serve as biomarkers of chronic BZ poisoning                                                                                     | 10 total differentially expressed proteins: ↑ C3, ApoA-1 and AACT compared to normal; ↑ kininogen-1, ↑ transthyretin, ↑ vitronectin, ↑ clusterin, ↑ a1-AT; ↓ serum amyloid P-component, ↓ haptoglobin                                                                                                |

Assume all mean differences are significant at  $p < 0.05$  unless marked below:

<sup>a</sup>The mean difference is significant at 0.01 (equal or less)

<sup>b</sup>The mean difference is significant at 0.001 (equal or less)

**Abbreviations:** a1-AT, alpha-1-antitrypsin; AACT, alpha-1-antichymotrypsin; ALP, alkaline phosphatase; apo, apolipoprotein; BTEX, benzene, toluene, ethylbenzene, xylene; btwn, between; BTX, benzene, toluene, xylene; BUN, blood urea nitrogen; BZ, benzene; C3, complement 3; CAT, catechol; CBC, complete blood count; CC-16, clara cell protein; Cr, creatinine; CRP, C-reactive protein; Ctrl, control; ECP, eosinophil cationic protein; EPO, erythropoietin; Exp, exposed; FIVC, forced inspiratory vital capacity; FRAC, total ferric reducing antioxidant capacity; FVC, forced vital capacity; g, gram; gCr, gram creatinine; GLT<sub>50</sub>, measure of red cell fragility; GM-CSF, granulocyte-macrophage colony-stimulating factor; GS, gas station workers; Hb, hemoglobin; HCT, hematocrit; HQ, hydroquinone; IC, inspiratory capacity; ICAM-1, intercellular adhesion molecule 1; L, liter; LDH, lactate dehydrogenase; LS, leather shoe factory workers; LTB4, leukotriene B4; max, maximum; mg, milligram; MCH, mean corpuscular hemoglobin; MCHC, mean corpuscular hemoglobin

concentration; MCV, mean corpuscular volume; MPV, mean platelet volume; molCr, mole creatinine; ng, nanogram; OR, odds ratio; PAIg, platelet-associated antibody; PBP, platelet basic protein; PDW, platelet distribution width; P-LCR, large platelet cell ratio; PLG, plasminogen; PM, particulate matter; ppm, parts per million; RBC, red blood cell; RDW, red blood cell distribution width; Ref, reference; ROS, reactive oxygen species; SGOT, serum glutamic-oxaloacetic transaminase; SNP, single nucleotide polymorphism; SOD, superoxide dismutase; SPMA, S-phenyl-mercapturic acid; T3, triiodothyronine; T4, thyroxine; T4F, free thyroxine; TBARS, thiobarbituric acid reactive substances; t,t-MA, trans,trans-muconic acid; TREC, T-cell receptor excision DNA circles; TSH, thyroid stimulating hormone; TWA, time-weighted average; ug, microgram; umol, micromole; unexp, unexposed; U.S.A., United States of America; VC, vital capacity; VOC, volatile organic compound; WBC, white blood cell; yrs, years.

**Table S4.** Detailed summary of human benzene studies with immunosuppressive outcomes.

| Ref # | Reference (Author, Year) | Study Type         | Population                                | Subject # (N)                                                                           | Location        | Exposure Assessment                                              | Exposure Level                                                                       | Outcome                                                                                                                                                                                       | Results                                                                                                                                                                                                                                                                                                                                                                              |
|-------|--------------------------|--------------------|-------------------------------------------|-----------------------------------------------------------------------------------------|-----------------|------------------------------------------------------------------|--------------------------------------------------------------------------------------|-----------------------------------------------------------------------------------------------------------------------------------------------------------------------------------------------|--------------------------------------------------------------------------------------------------------------------------------------------------------------------------------------------------------------------------------------------------------------------------------------------------------------------------------------------------------------------------------------|
| [32]  | Baiz, 2011               | Prospective cohort | Pregnant persons exposed to air pollution | N=56                                                                                    | France          | Personal exposure assessment of mothers w/ diffusive air sampler | 3.3 ± 2.0 ug/m <sup>3</sup>                                                          | <b>Development of newborn immune cells</b> (cord blood lymphocyte count): CD19+ B cells, CD16+56+ NK cells, CD3+ T cells, CD4+ T cells, CD8+ T cells, CD4+CD25+ T cells                       | ↓ CD4+CD25+ T cells                                                                                                                                                                                                                                                                                                                                                                  |
| [33]  | Barman, 2016             | Cross-sectional    | Petrol pump workers                       | N= 100; 50 exposed, 50 unexposed                                                        | India           | Proxy (occupation)                                               | Cumulative exposure per worker: Median (Range) = 17.92 (1.71-74.2) mg/m <sup>3</sup> | <b>Pulmonary function:</b> FVC, FEV1, FEV1/FVC, FEF 25-75%. PEFR, AEC<br><b>Eosinophil count</b>                                                                                              | ↓ FVC, ↓ FEV1, ↓ FEF25-75%, ↓ PEFR, ↓ eosinophil count                                                                                                                                                                                                                                                                                                                               |
| [34]  | Bassig, 2016             | Cross-sectional    | Shoe factory workers                      | N=390; 250 exposed workers, 140 unexposed workers                                       | China (Tianjin) | Personal passive monitoring                                      | Median (10th, 90th percentiles) = 1.2 ppm (0.3, 12.4)                                | Hematotoxicity, monosomy 7, B-cell activation                                                                                                                                                 | <b>Hematotoxicity:</b> All findings were exposure-dependent; ↓ WBCs <sup>b</sup> , ↓ granulocytes <sup>b</sup> , ↓ platelets <sup>b</sup> , ↓ lymphocytes <sup>a</sup> , ↓ CD4 T cells, ↓ CD4/CD8 ratio, ↓ B cells <sup>b</sup> , ↓ NK cells <sup>a</sup><br><b>B-cell activation:</b> ≥10 ppm: ↓sCD27<br><b>Monosomy 7:</b> <10 ppm: ↓monosomy 7, ≥10 ppm: ↑monosomy 7 <sup>a</sup> |
| [35]  | Biro, 2002               | Cross-sectional    | Occupational workers                      | N=72; 10 styrene exposed, 10 PAH exposed, 9 BZ exposed, 14 mixed exposure, 29 unexposed | Hungary         | Proxy (occupational)                                             | N/A                                                                                  | <b>Lymphocyte populations:</b> CD3, CD4, CD8 CD14, CD19, CD25, CD38, CD45, CD45RO, CD54, CD56, CD62L, CD71, HLA-DR<br><b>Genotoxicological parameters:</b> CA, SCE, unscheduled DNA synthesis | <b>Lymphocytes:</b><br><b>Mixed exposure:</b> ↓ leukocytes, ↓ neutrophils, ↓ CD3 T-cells, ↑ CD19+ B cells, ↓CD25+/CD3+, ↓ CD25+/CD4+, ↑ CD71+/CD3+, ↑ HLA-DR+/CD3+, ↑ CD45RO+/CD3+, ↑ CD45RO+/CD4+<br><b>BZ-exp:</b> ↑ HLA-DR+/CD3+, ↑ CD71+/CD19+, ↓ CD62L+/CD3+                                                                                                                    |

|      |                   |                 |                                                              |                                                            |          |                                                                                                                                                      |                                                                                                                                                                                                                                                                                             |                                                                                                                                                                                                                                                                                                                                                    |                                                                                                                                                                                                                        |
|------|-------------------|-----------------|--------------------------------------------------------------|------------------------------------------------------------|----------|------------------------------------------------------------------------------------------------------------------------------------------------------|---------------------------------------------------------------------------------------------------------------------------------------------------------------------------------------------------------------------------------------------------------------------------------------------|----------------------------------------------------------------------------------------------------------------------------------------------------------------------------------------------------------------------------------------------------------------------------------------------------------------------------------------------------|------------------------------------------------------------------------------------------------------------------------------------------------------------------------------------------------------------------------|
| [3]  | Bogadi-Sare, 1997 | Cross-sectional | Shoe factory workers                                         | N=76; 49 exposed, 27 unexposed                             |          | General air sampling, BZ in blood (before workshift and in the middle of the working week), phenol in urine (before and end of the same working day) | <p><b>General air sampling:</b> 5.9 (1.9-14.8) ppm</p> <p><b>BZ in blood:</b> Exp: 0.005 mg/L<br/>Ctrl: 0.000 mg/L</p> <p><b>Phenol in pre-shift urine:</b> Exp: 3.840 mg/gCr<br/>Ctrl: 2.197 mg/gCr</p> <p><b>Phenol in post-shift urine:</b> Exp: 5.240 mg/gCr<br/>Ctrl: 2.759 mg/gCr</p> | <p><b>Hematological parameters:</b> CBC, Hb, HCT, MCV, MCH, MCHC, reticulocytes, serum iron, ALP in neutrophils, and GLT<sub>50</sub></p>                                                                                                                                                                                                          | <p>↑ band neutrophils, ↑ MCV, ↓ hemoglobin, ↓ MCHC<sup>b</sup>, ↑ RBC glycerol lysis time, ↑ GLT<sub>50</sub><sup>a</sup></p> <p>↓ WBC<sup>a</sup>, ↓ segmented neutrophils<sup>a</sup>, ↓ lymphocytes<sup>a</sup></p> |
| [36] | Bogadi-Sare, 2000 | Cross-sectional | Shoe factory workers                                         | N=75; 49 exposed, 26 unexposed                             | Croatia? | Workplace area monitoring (stationary sampling at 10 stations); blood BZ levels, urinary phenol levels                                               | <p><b>Air:</b> Median (range) = 5.9 (1.9-14.8) ppm</p> <p><b>Blood:</b> 0.005 (0.002-0.030) mg/l</p> <p><b>Urine:</b> 5.240 (2.150-27.310) mg/gCr phenol post-shift</p>                                                                                                                     | <p><b>Immunological parameters:</b> IgA, IgM, IgG, B- and T-lymphocytes</p>                                                                                                                                                                                                                                                                        | <p>↑ IgG, ↓ B-lymphocytes<sup>a</sup></p>                                                                                                                                                                              |
| [37] | Boscolo, 2000     | Cross-sectional | Non-symptomatic atopic women exposed to an urban environment | N=60; 30 non-symptomatic atopic women, 30 non-atopic women | Italy    | Urinary t,t-MA levels                                                                                                                                | <p>Median (25th-75th percentiles)</p> <p><b>Atopic:</b> 44.0 (18.5-111.8) ug/l</p> <p><b>Control:</b> 60.0 (17.7-100.7) ug/l</p>                                                                                                                                                            | <p><b>Lymphocyte subpopulations:</b> helper CD4-CD45RO T cells, CD3-CD8 lymphocytes, CD16-CD56 NK cells, CD19 B lymphocytes, CD3-HLA-DR (activated T, B, and NK lymphocytes), CD3-CD25 (T and B lymphocytes activated by IL-2)</p> <p><b>Cytokines:</b> IL-4, IFN-γ</p> <p><b>Trace elements:</b> blood Pb, serum Zn and Cu, urinary Cr and Ni</p> | <p>t,t-MA positively correlated with CD16+CD56+ NK cells</p>                                                                                                                                                           |

|      |                  |                      |                                                                           |                                                                                                              |        |                                                                                                                                   |                                                                                                                                                                                                                                                                                       |                                                                                                                                                                                            |                                                                                                                                                       |
|------|------------------|----------------------|---------------------------------------------------------------------------|--------------------------------------------------------------------------------------------------------------|--------|-----------------------------------------------------------------------------------------------------------------------------------|---------------------------------------------------------------------------------------------------------------------------------------------------------------------------------------------------------------------------------------------------------------------------------------|--------------------------------------------------------------------------------------------------------------------------------------------------------------------------------------------|-------------------------------------------------------------------------------------------------------------------------------------------------------|
| [38] | Casale, 2016     | Cross-sectional      | Outdoor police workers exposed to urban traffic areas                     | N=215; 112 traffic policemen, 69 drivers, 9 motorcyclists, 25 workers with other outdoor tasks (all exposed) | Italy  | Blood BZ levels; individual air sampling (8 traffic policemen, 4 police drivers)                                                  | <b>Air:</b><br>Traffic police: 337.1 ± 287.09 ug/m <sup>3</sup><br>Drivers: 304 ± 365.2 ug/m <sup>3</sup><br>Motorcyclists: 206.33 ± 89.82 ug/m <sup>3</sup><br>Other: 185.04 ± 45.94 ug/m <sup>3</sup><br><b>Blood:</b><br>Traffic: 17.28 ± 10.42 ng/l<br>Drivers: 10.81 ± 7.85 ng/l | Blood cell counts                                                                                                                                                                          | ↓ WBCs, ↓ neutrophils, ↓ lymphocytes                                                                                                                  |
| [4]  | Chen, 2019       | Cross-sectional      | Residents near a petrochemical complex                                    | N=421; 240 exposed, 181 unexposed                                                                            | China  | Blood BZ levels                                                                                                                   | Mean<br><b>Non-smokers:</b><br>Exp: 41 ng/L<br>Ctrl: 15 ng/L<br><b>Smokers:</b><br>Exp: 49 ng/L<br>Ctrl: 14 ng/L                                                                                                                                                                      | <b>Hematological parameters:</b> WBCs, neutrophils, lymphocytes, monocytes, eosinophils, basophils, RBCs, Hb, HCT, MCV, MCHC, platelets                                                    | Correlated w/ t,t-MA: ↓ MCHC, ↓ platelets, ↑ monocytes<br>All exposed: ↓ neutrophil, ↓ RBC, ↓ Hb, ↓ HCT, ↓ MCHC, ↓ platelet, ↑ monocytes, ↑ basophils |
| [39] | Cody, 1993       | Retrospective cohort | Rubber hydrochloride workers                                              | N=161; all exposed                                                                                           | U.S.A. | Proxy (occupation)                                                                                                                |                                                                                                                                                                                                                                                                                       | <b>Blood cell counts:</b> WBC, RBC                                                                                                                                                         | ↓ WBC during first 4 months (p = 0.04), ↑ WBC during months 6-11 (p = 0.05)                                                                           |
| [40] | D' Andrea, 2013a | Retrospective cohort | People exposed to flaring incident at the British Petroleum (BP) refinery | N=200; 100 exposed, 100 unexposed                                                                            | U.S.A. | Subjects were chosen from residential areas in and surrounding Texas City, USA<br><br>Urinary phenol levels                       | Mean = 22.7 mg/L                                                                                                                                                                                                                                                                      | <b>Hematological function:</b> WBC count, platelet count, Hb, HCT, blood urea nitrogen (BUN), creatinine<br><b>Hepatic function:</b> ALP, AST, ALT<br><b>Renal function:</b> Creatinine    | ↑ WBC <sup>b</sup> , ↑ platelet <sup>a</sup> , ↑ ALP <sup>b</sup> , ↑ AST <sup>a</sup> ;<br>↓ BUN <sup>b</sup> , ↓ creatinine                         |
| [41] | D' Andrea, 2013b | Retrospective cohort | Subjects exposed to oil spill and disperant                               | N=247; 117 exposed, 130 unexposed                                                                            | U.S.A. | Participants in oil spill clean-up activities along the coast of Louisiana for a duration of over 3 months; urinary phenol levels | <b>20-29 years:</b> 8.7 ± 9.5 mg/L<br><b>30-39 years:</b> 7.6 ± 9.9 mg/L<br><b>40+ years:</b> 5.3 ± 5.9 mg/L                                                                                                                                                                          | <b>Hematological function:</b> WBC, platelet, Hb, HCT, BUN, creatinine<br><b>Hepatic function:</b> ALP, AST, ALT<br><b>Renal function:</b> Creatinine<br><b>Somatic symptom complaints</b> | ↓ platelet, ↓ BUN, ↑ Hb <sup>b</sup> , ↑ HCT <sup>b</sup> , ↑ ALP <sup>b</sup> , ↑ AST <sup>a</sup> , ↑ HCT <sup>b</sup>                              |

|      |                  |                      |                                                                                             |                                        |        |                                                                                                             |                                                                                                                                                                                       |                                                                                                                                                                                                                                                                               |                                                                                                                                                                                                       |
|------|------------------|----------------------|---------------------------------------------------------------------------------------------|----------------------------------------|--------|-------------------------------------------------------------------------------------------------------------|---------------------------------------------------------------------------------------------------------------------------------------------------------------------------------------|-------------------------------------------------------------------------------------------------------------------------------------------------------------------------------------------------------------------------------------------------------------------------------|-------------------------------------------------------------------------------------------------------------------------------------------------------------------------------------------------------|
| [42] | D' Andrea, 2014a | Retrospective cohort | Children (<17 years old) exposed to flaring incident at the British Petroleum (BP) refinery | N=312; 157 exposed, 155 unexposed      | U.S.A. | Subjects were chosen from residential areas in and surrounding Texas City, USA<br><br>Urinary phenol levels | Exposed to BZ for a prolonged period up to 40 days from BP refinery flaring disaster that occurred on April 6, 2010 and lasted through May 16, 2010<br><br>Mean = 8.0 (1.0-64.2) mg/L | <b>Hematological function:</b> WBC count, platelet count, Hb, HCT, BUN, creatinine<br><b>Hepatic function:</b> ALP, AST, ALT<br><b>Renal function:</b> Serum creatinine<br><b>Somatic symptoms</b>                                                                            | ↓ WBC, ↑ platelet <sup>a</sup> , ↑ ALP, ↑ AST, ↑ ALT <sup>a</sup> , ↑ creatinine <sup>b</sup>                                                                                                         |
| [43] | D' Andrea, 2014b | Retrospective cohort | Nonsmoking subjects exposed to flaring incident at British Petroleum (BP) refinery          | N=1422; 1093 exposed and 329 unexposed | U.S.A. | Subjects were chosen from residential areas in and surrounding Texas City, USA                              | Exposed to BZ for a prolonged period up to 40 days from BP refinery flaring disaster that occurred on April 6, 2010 and lasted through May 16, 2010                                   | <b>Hematological function:</b> WBC count, platelet count, Hb, HCT, blood urea nitrogen (BUN), creatinine<br><b>Hepatic function:</b> Alkaline phosphatase (ALP), aspartate amino transferase (AST), alanine aminotransferase (ALT)<br><b>Renal function:</b> Serum creatinine | ↑ WBC <sup>b</sup> , ↑ platelet <sup>b</sup> , ↑ Hb <sup>b</sup> , ↑ HCT <sup>b</sup> , ↑ creatinine <sup>b</sup> , ↑ BUN <sup>b</sup> , ↑ ALP <sup>b</sup> , ↑ AST <sup>b</sup> , ↑ ALT <sup>b</sup> |
| [44] | D' Andrea, 2016  | Retrospective cohort | Adults (18+) exposed to flaring incident at British Petroleum (BP) refinery                 | N=2123; 1826 exposed, 387 unexposed    | U.S.A. | Self-reported exposure; subjects chosen from residential areas in and surrounding Texas City, USA           | Exposed to BZ for a prolonged period up to 40 days from BP refinery flaring disaster that occurred on April 6, 2010 and lasted through May 16, 2010                                   | <b>Hematological function:</b> WBC count, platelet count, Hb, HCT, BUN, creatinine<br><b>Hepatic function:</b> ALP, AST, ALT<br><b>Renal function:</b> Serum creatinine                                                                                                       | ↑ WBC <sup>b</sup> , ↑ platelet <sup>b</sup> , ↑ creatinine <sup>b</sup> , ↑ ALP <sup>b</sup> , ↑ AST <sup>b</sup> , ↑ AST <sup>b</sup>                                                               |
| [45] | D' Andrea, 2017  | Retrospective cohort | Smoking subjects exposed to flaring incident at British Petroleum (BP) refinery             | N=791; 733 exposed, 58 unexposed       | U.S.A. | Subjects were chosen from residential areas in and surrounding Texas City, USA                              | Exposed to BZ for a prolonged period up to 40 days from BP refinery flaring disaster that occurred on April 6, 2010 and lasted through May 16, 2010                                   | <b>Hematological function:</b> WBC count, platelet count, Hb, HCT, BUN, creatinine<br><b>Hepatic function:</b> ALP, AST, ALT<br><b>Renal function:</b> Serum creatinine                                                                                                       | ↑ WBC <sup>a</sup> , ↑ platelets <sup>b</sup> , ↑ ALP <sup>a</sup> , ↑ AST, ↑ ALT                                                                                                                     |

|      |               |                 |                                                        |                                                   |                 |                                                                                                        |                                                                                                                                                                             |                                                                                                                                                                                      |                                                                                                                                                                                                                                                                                                                                                                                                                                             |
|------|---------------|-----------------|--------------------------------------------------------|---------------------------------------------------|-----------------|--------------------------------------------------------------------------------------------------------|-----------------------------------------------------------------------------------------------------------------------------------------------------------------------------|--------------------------------------------------------------------------------------------------------------------------------------------------------------------------------------|---------------------------------------------------------------------------------------------------------------------------------------------------------------------------------------------------------------------------------------------------------------------------------------------------------------------------------------------------------------------------------------------------------------------------------------------|
| [5]  | Doherty, 2017 | Cross-sectional | Adult residents of U.S. Gulf Coast (oil spill workers) | N=406                                             | U.S.A.          | Blood BTEX concentration                                                                               | Geometric Mean<br><b>Exp:</b><br>Tobacco Smoke-exp: 91 ng/L<br>Tobacco Smoke-unexp: 25 ng/L<br><b>Ctrls:</b><br>Tobacco Smoke-exp: 188 ng/L<br>Tobacco Smoke-unexp: 22 ng/L | <b>Hematological parameters:</b> RBC, Hb, hematocrit, mean corpuscular hemoglobin concentration, RBC distribution width, Platelets, neutrophils, lymphocytes, monocytes, eosinophils | <b>Tobacco smoke unexposed:</b><br>↓ Hb, ↓ MCHC; ↑ RDW<br><b>Tobacco smoke exposed:</b><br>↑ RBC, ↑ WBC <sup>b</sup> , ↑ Hb, ↑ HCT <sup>b</sup> , ↑ MCV, ↑ MCHC, ↑ neutrophils <sup>b</sup> , ↑ lymphocytes <sup>b</sup> , ↑ monocytes <sup>a</sup>                                                                                                                                                                                         |
| [6]  | Dutta, 2013   | Cross-sectional | Premenopausal rural women                              | N=345; 196 biomass users, 149 petroleum gas users | India           | Urinary t,t-MA levels (PM <sub>10</sub> air measurements were also taken)                              | <b>Exp:</b> 6.4 ± 4.3 mg/l (p<0.05)<br><b>Ctrl:</b> 1.1 ± 0.7 mg/l                                                                                                          | <b>Airway inflammation:</b> IL-6, IL-8, TNF-α<br><b>Sputum cytology</b><br><b>Oxidative stress:</b> ROS, SOD                                                                         | <b>Cellular count:</b> ↑ total cell count <sup>b</sup> , ↑ neutrophils, ↑ eosinophils, ↑ lymphocytes, ↑ alveolar macrophages<br><b>Sputum cytology:</b> ↑ metaplasia <sup>b</sup> + ↑ dysplasia <sup>b</sup> , ciliocytophthoria, Charcot-Leyden crystals, Curschmann's spiral<br><b>Inflammation:</b> ↑ TNF-α <sup>b</sup> , ↑ IL-6 <sup>b</sup> , ↑ IL-8 <sup>b</sup><br><b>Oxidative stress:</b> ↑ ROS <sup>b</sup> , ↓ SOD <sup>b</sup> |
| [46] | Erdei, 2003   | Cross-sectional | Schoolchildren 9-11 years old                          | N=2788                                            | Hungary         | Passive monitoring of 33 children's homes (bedroom)                                                    |                                                                                                                                                                             | Immune biomarkers; hematological parameters                                                                                                                                          | BZ displayed positive, but nonsignificant associations with # of lymphocytes and eosinophil granulocytes                                                                                                                                                                                                                                                                                                                                    |
| [9]  | Forrest, 2005 | Cross-sectional | Shoe factory workers                                   | N=12; 6 highly exposed workers, 6 ctrls           | China (Tianjin) | Personal passive monitoring                                                                            | 47.3 ± 24.3 ppm                                                                                                                                                             | Global gene expression                                                                                                                                                               | ↑ <i>CXCL16</i> , ↑ <i>ZNF33</i> , ↓ <i>JUN</i> , ↓ <i>PF4</i>                                                                                                                                                                                                                                                                                                                                                                              |
| [47] | Froom, 1994   | Case report     | Pipe fitter                                            | N=1                                               | Israel          | Unclear - personal detection<br>Area monitoring (every 3 months for an year)                           | <b>Personal detection:</b> 0.9 ppm BZ TWA, 0.1 ppm phenol<br><b>Area monitoring:</b> 03-1.2 ppm                                                                             | WBC counts, production of erythropoietin-independent BFU-E colonies                                                                                                                  | <b>During exposure:</b> Leukocytosis, ↑ WBCs, erythropoietin-independent BFU-E colonies<br><b>Exposure terminated:</b> ↓ BFU-E, WBC, and leukocyte alkaline phosphatase scores to normal over 12 months                                                                                                                                                                                                                                     |
| [48] | Hancock, 1984 | Cross-sectional | Coke oven workers                                      | N= 91; 70 exposed, 21 unexposed                   |                 | Available personal monitoring, general air sampling, estimates by plant environmental health engineers | Low-level BZ exposure:<br>Acid plant : 0.1 ppm<br>Litol Plant: 1.8 ppm<br>Plant A: 1.9 ppm<br>Plant B:1.9 ppm<br>BZ Plant: 31.5 ppm                                         | <b>Hematological parameters:</b> RBC, WBC, Hb                                                                                                                                        | No significant difference in blood parameters                                                                                                                                                                                                                                                                                                                                                                                               |

|      |                |                 |                |                                |      |                                                                                                                              |                                                                                                                                                                                                                                                                                                                                                                                                                                                                                                                                                                                   |                                                                                                                                                                                         |                                                                                                                                                                                             |
|------|----------------|-----------------|----------------|--------------------------------|------|------------------------------------------------------------------------------------------------------------------------------|-----------------------------------------------------------------------------------------------------------------------------------------------------------------------------------------------------------------------------------------------------------------------------------------------------------------------------------------------------------------------------------------------------------------------------------------------------------------------------------------------------------------------------------------------------------------------------------|-----------------------------------------------------------------------------------------------------------------------------------------------------------------------------------------|---------------------------------------------------------------------------------------------------------------------------------------------------------------------------------------------|
| [49] | Harati, 2017   | Cross-sectional | Painters       | N=80; 40 exposed, 40 unexposed | Iran | Sampling of breathing zone                                                                                                   | Range = 0.54-0.83 ppm daily<br>TWA = 0.69 ± 0.14 ppm daily                                                                                                                                                                                                                                                                                                                                                                                                                                                                                                                        | <b>Hematological parameters:</b> RBC, WBC, HCT, Hb, platelet, white cell differential count                                                                                             | ↓ eosinophils <sup>b</sup> , ↑ MCHC <sup>a</sup>                                                                                                                                            |
| [50] | Haufroid, 1997 | Cross-sectional | Garage workers | N=309                          |      | Questionnaire, general workplace air sampling (during the whole workshift), urine HQ, CA, SPMA level (collected after shift) | <b>Air:</b> < 0.001 ppm<br><b>Urinary (mg/g):</b><br>Never smokers:<br>MA:0.08<br>HQ:1.06<br>CA: 2.92<br>SPMA: 0.64<br>Phenol: 2.58<br>Ex-smokers:<br>MA:0.08<br>HQ: 1.39<br>CA:4.6<br>SPMA:2.09<br>Phenol: 3.24<br>1-10 Cigarettes:<br>MA: 0.13<br>HQ: 1.50<br>CA: 3.42<br>SPMA: 2.09<br>Phenol: 2.38<br>11-20 Cigarettes:<br>MA: 0.17<br>HQ: 2.40<br>CA: 6.52<br>SPMA: 2.85<br>Phenol: 3.04<br>>20 Cigarettes:<br>MA: 0.18<br>HQ: 2.49<br>CA: 6.31<br>SPMA: 2.55<br>Phenol: 3.19<br>Pipe, cigars, cigarillos:<br>MA: 0.20<br>HQ: 2.22<br>CA: 5.92<br>SPMA: 2.62<br>Phenol: 4.95 | <b>Hematological parameters:</b> leukocytes, neutrophils, lymphocytes, monocytes, eosinophils, basophils, large unstained cells, erythrocytes, hematocrit, Hb, MCV, thrombocytes, IL-1a | ↑ leukocytes <sup>b</sup> , ↑ neutrophils <sup>b</sup> , ↑ lymphocytes <sup>b</sup> , ↑ monocytes <sup>b</sup> , ↑ basophils <sup>b</sup> , ↓ RBC <sup>b</sup> , ↑ HCT <sup>b</sup> , ↑ MCV |



|      |                          |                 |                                                   |                                                                                                           |          |                                                                                                       |                                                                                                                                                              |                                                                                 |                                                                                                                                                                     |
|------|--------------------------|-----------------|---------------------------------------------------|-----------------------------------------------------------------------------------------------------------|----------|-------------------------------------------------------------------------------------------------------|--------------------------------------------------------------------------------------------------------------------------------------------------------------|---------------------------------------------------------------------------------|---------------------------------------------------------------------------------------------------------------------------------------------------------------------|
| [11] | Hotz, 1998               | Cross-sectional | Mechanics                                         | N=307; 199 exposed, 108 unexposed                                                                         |          | Questionnaire; general workplace sampling (TWA during whole workshift)                                | <1.14 ppm                                                                                                                                                    | Hematological parameters; IL-1 $\alpha$ production                              | No significant change in IL-1 $\alpha$ production and in hematological parameters                                                                                   |
| [51] | Hristeva-Mirtcheva, 1998 | Cross-sectional | Petrol processing workers                         | N=208; 171 exposed, 37 unexposed                                                                          | Bulgaria | Unclear                                                                                               | <b>Group 1:</b> exposed to 6-7 times above maximum allowable concentration (MAC) values<br><b>Group 2:</b> 2-3X above MAC<br><b>Group 3:</b> near MAC values | Hematological parameters                                                        | WBC count abnormalities (leukocytosis, slight leukopenia, neutropenia, lymphocytosis) - statistically significant                                                   |
| [52] | Huang, 2012              | Cross-sectional | Chronically exposed patients                      | N=18; 9 patients, 9 unexposed (for validation, samples from 30 other cases and 30 controls were included) | China    | Short-term exposure air concentrations at workplace, BZ concentrations in used solvent materials      | <b>Mean BZ exposure concentration:</b> 357.996 mg/m <sup>3</sup> ;<br><b>Mean BZ concentration in solvent:</b> 55.43%                                        | Proteomics, hematological parameters                                            | ↑ PLG, ↓ PBP, ↓ Apo B100<br><b>Hematological parameters:</b> ↓ WBC, ↓ neutrophils, ↓ platelet, ↓ RBC, and ↓ Hb                                                      |
| [53] | Huang, 2014              | Cross-sectional | Petrochemical factory workers                     | N=231; 121 exposed, 110 unexposed                                                                         | China    | Workplace monitoring (7 sampling points in the workshop of the refinery between Jan 2008 - June 2012) | Cumulative exposure per worker: Median (Range) = 17.92 (1.71-74.2) mg/m <sup>3</sup>                                                                         | <b>Hematological:</b> WBC count, Hb, platelets, PDW, MPV, P-LCR<br><b>PAIgs</b> | ↑ PDW, ↑ MPV, ↑ P-LCR <sup>a</sup> , ↑ P AIgG, ↑ PAIgA, ↑ PAIgM                                                                                                     |
| [12] | Ibrahim, 2014            | Cross-sectional | Ceramic factory workers                           | N=164; 81 exposed, 83 unexposed                                                                           | Egypt    | Urinary t,t-MA levels                                                                                 | <b>Exposed:</b> 0.22 ± 0.48 mg/gCr<br><b>Control:</b> 0.043 ± 0.008 mg/gCr                                                                                   | <b>Hematological parameters:</b> WBCs, RBCs, Hb, HCT, MCV, MCH, MCHC            | ↓ WBC, ↓ RBCs, ↓ Hb <sup>b</sup> , ↓ HCT <sup>a</sup> , ↑ MCV <sup>a</sup> , ↓ MCHC <sup>a</sup> , ↓ platelets                                                      |
| [54] | Kamal, 2012              | Cross-sectional | Automobile workers (mechanics and spray painters) | N=78; 24 mechanics, 25 painters, 29 unexposed                                                             | Pakistan | Workplace air sampling                                                                                | Unreported                                                                                                                                                   | <b>Hematological parameters:</b> RBCs, WBCs, platelets, Hb, PCV, MCV            | <b>Painters:</b> ↓ RBCs, ↓ WBCs, ↓ Hb, ↓ MCV <sup>a</sup> , ↓ PCV<br><b>Mechanics:</b> ↓ RBCs, ↓ Hb<br><b>All exposed:</b> ↓ RBCs, ↓ Hb <sup>a</sup> , ↓ MCV, ↓ PCV |
| [55] | Kasemy, 2019             | Cross-sectional | Taxi drivers                                      | N=400; 280 exposed, 120 unexposed                                                                         | Egypt    | Ambient air measurements inside 120 taxis                                                             | Mean = 0.89 ± 0.42 ppm                                                                                                                                       | Complete blood count                                                            | ↓ TLC <sup>b</sup> , ↓ platelet <sup>b</sup> , ↓ MCH <sup>a</sup> , ↑ MCHC <sup>b</sup>                                                                             |

|      |                 |                      |                                |                                   |                 |                                                                                                                      |                                                                                                                                    |                                                                                                                                               |                                                                                                                                                                                                                                     |
|------|-----------------|----------------------|--------------------------------|-----------------------------------|-----------------|----------------------------------------------------------------------------------------------------------------------|------------------------------------------------------------------------------------------------------------------------------------|-----------------------------------------------------------------------------------------------------------------------------------------------|-------------------------------------------------------------------------------------------------------------------------------------------------------------------------------------------------------------------------------------|
| [56] | Kipen, 1988     | Retrospective cohort | Rubber hydrochloride workers   | N=459; all exposed                | U.S.A           | BZ concentrations estimated by period and area (see Table 1)                                                         |                                                                                                                                    | <b>Hematological parameters:</b> complete blood count, RBC, WBC, Hb, lymphocytes, monocytes, eosinophils, basophils                           | <b>Early effects (1940-1948):</b> ↓ WBC, ↓ large lymphocytes <sup>a</sup><br>No persistent trend over the ensuing 25 years                                                                                                          |
| [57] | Kirkeleit, 2006 | Cross-sectional      | Cargo tank workers             | N=22; 13 exposed; 9 unexposed     | Norway          | Individual air sampling; urinary BZ levels; blood BZ levels                                                          | <b>Air:</b> 0.15 (0.01-0.62) ppm<br><b>Urine</b> (post-shift): mean = 27.0 nmol/l<br><b>Blood</b> (post-shift): mean = 12.3 nmol/l | <b>Lymphocytes:</b> total lymphocytes, CD3, CD4, CD8, CD19, CD56, CD4/CD8 ratio<br><b>Complement:</b> C3, C4<br><b>Ig:</b> IgG, IgA, IgM, IgE | ↓ IgM, ↓ IgA <sup>a</sup> , ↓ CD4 T cells                                                                                                                                                                                           |
| [58] | Koh, 2015       | Cross-sectional      | Korean workers                 | N=10702                           | Korea           | TWA personal air benzene measurements                                                                                | 0.192 ± 2.233 ppm                                                                                                                  | Blood cell counts                                                                                                                             | No statistically significant results (only significant when stratified by gender)                                                                                                                                                   |
| [59] | Lan, 2004       | Cross-sectional      | Clothes factory workers        | N=390; 250 exposed, 140 unexposed | China (Tianjin) | Individual benzene exposure monitoring                                                                               | Mean benzene exposure level:<br><b>Shoe factory A:</b> 21.86 ppm<br><b>Shoe factory B:</b> 3.46 ppm                                | <b>Hematological parameters:</b> Complete blood count, myeloid progenitor colony formation                                                    | ↓ WBC <sup>b</sup> , ↓ granulocytes <sup>b</sup> , ↓ lymphocytes <sup>a</sup> , ↓ CD4+ T cells, ↓ CD4+/CD8+ ratio, ↓ B cells <sup>b</sup> , ↓ NK cells <sup>b</sup> , ↓ platelets <sup>b</sup> , ↓ progenitor cell colony formation |
| [60] | Lan, 2005       | Cross-sectional      | Shoe factory workers           | N=90; 45 exposed, 45 unexposed    | China (Tianjin) | Individual passive monitoring; urinary BZ levels                                                                     | <b>Air:</b> 15.8 ± 17.9 ppm<br><b>Urine:</b> 452.6 ± 961.7 ug/l                                                                    | T-cell receptor excision DNA circles (TREC) levels                                                                                            | No significant difference in TREC levels per 10 <sup>6</sup> peripheral blood leukocytes                                                                                                                                            |
| [15] | Li, 2009a       | Cross-sectional      | Occupationally exposed workers | N=165; 138 exposed, 27 unexposed  | China           | Workplace air sampling or diagnosis of BZ poisoning by the Occupational Diseases Diagnosis Group in Guangzhou, China | 37.8 mg/m <sup>3</sup>                                                                                                             | T-cell receptor excision DNA circles (TREC) levels                                                                                            | ↓ TRECs, ↓ WBCs, ↓ Hb, ↓ platelets, ↓ RBCs                                                                                                                                                                                          |
| [61] | Li, 2009b       | Cross-sectional      | BZ exposed workers             | N=25; 16 exposed, 9 unexposed     | China           | Air sampling of workplace                                                                                            | 37.8 mg/m <sup>3</sup>                                                                                                             | CDR3 region of T cells                                                                                                                        | ↓ Vβ subfamilies (P<0.05); most frequently used genes are Vβ3, Vβ21, Vβ6, Vβ16                                                                                                                                                      |

|      |                 |                 |                                                  |                                                                                            |                 |                                                                                                  |                                                                                                                                                                                                  |                                                                                                                                                      |                                                                                                                                                                                                                                                                                                                                                                                                                               |
|------|-----------------|-----------------|--------------------------------------------------|--------------------------------------------------------------------------------------------|-----------------|--------------------------------------------------------------------------------------------------|--------------------------------------------------------------------------------------------------------------------------------------------------------------------------------------------------|------------------------------------------------------------------------------------------------------------------------------------------------------|-------------------------------------------------------------------------------------------------------------------------------------------------------------------------------------------------------------------------------------------------------------------------------------------------------------------------------------------------------------------------------------------------------------------------------|
| [62] | Li, 2012        | Cross-sectional | Paint factory workers                            | N=46; 20 exposed, 7 chronic mild BZ poisoning, 5 chronic severe BZ poisoning, 14 unexposed | China           | Diagnosis of BZ poisoning according to the Diagnostic Criteria of Occupational Benzene Poisoning | Unclear                                                                                                                                                                                          | <b>Hematological:</b> CD3, CD4, CD8 lymphocyte levels<br><b>Gene expression:</b> CD3 $\gamma$ , CD3 $\delta$ , CD3 $\epsilon$ , CD3 $\zeta$          | <b>Hematological:</b> $\downarrow$ CD4+ T lymphocytes, $\downarrow$ CD4+/CD8+ ratio (significant in each group except mild BZ-poisoned)<br><b>Gene expression:</b> BZ-exposed: $\uparrow$ CD3 $\delta^a$ , $\uparrow$ CD3 $\epsilon$ , $\uparrow$ CD3 $\zeta$<br>Mild BZ-poisoned: no significant differences<br>Severe BZ-poisoned: $\downarrow$ CD3 $\gamma^a$ , $\downarrow$ CD3 $\epsilon^a$ , $\downarrow$ CD3 $\zeta^a$ |
| [63] | Li, 2018        | Cross-sectional | Petrochemical factory workers                    | N=269; 147 exposed, 122 unexposed                                                          | China           | Individual air sampling of 18 exposed workers, Urinary SPMA levels                               | <b>Air :</b><br>Exposed: 0.120 (0.007-0.345) mg/m <sup>3</sup><br>Unexposed: 0.120 (0.065-0.280) mg/m <sup>3</sup><br><b>Urinary SPMA:</b><br>Exposed: 100.12 ng/gCr<br>Unexposed: 55.25 ng/g Cr | <b>Hematological parameters:</b> WBCs, neutrophils, lymphocytes, monocytes, RBC, platelets                                                           | $\downarrow$ WBC <sup>b</sup> , $\downarrow$ neutrophils, $\downarrow$ lymphocytes <sup>b</sup> , $\downarrow$ monocytes <sup>b</sup>                                                                                                                                                                                                                                                                                         |
| [64] | Li, 2019        | Cross-sectional | Residents around a petrochemical industrial zone | N=499 (all exposed)                                                                        | China           | Blood BZ levels                                                                                  | Median (25th, 75th percentiles)<br><b>Male:</b> 0.162 (0.053, 0.364) ug/L<br><b>Female:</b> 0.130 (0.062, 0.355) ug/L                                                                            | <b>Hematological parameters:</b> WBC, neutrophil, lymphocyte, monocytes, eosinophil, basophil, RBC, Hb, MCV, MCH, MCHC, RDW, platelet, PDW, MPV, PCT | Abnormal rate of eosinophils (28.7%), basophils (16.2%), HCT (17.2%), MCHC (14.8%)                                                                                                                                                                                                                                                                                                                                            |
| [17] | McHale, 2009    | Cross-sectional | Shoe factory workers                             | N=16; 8 exposed, 8 unexposed                                                               | China (Tianjin) | Personal passive monitoring                                                                      | 47.3 $\pm$ 24.3 ppm                                                                                                                                                                              | Global gene expression                                                                                                                               | $\uparrow$ <i>CXCL16</i> , $\uparrow$ <i>ZNF331</i> , $\downarrow$ <i>JUN</i> , $\downarrow$ <i>PF4</i>                                                                                                                                                                                                                                                                                                                       |
| [65] | Midzenski, 1992 | Cohort          | Shipyards workers (degassers)                    | N=15; all exposed                                                                          | U.S.A           | Industrial sampling of tanks                                                                     | Range = 60 - 600 ppm                                                                                                                                                                             | Clinical symptoms<br><b>Hematological parameters:</b> CBC, WBCs, lymphocytes, MCV, Hb, platelets, hematological abnormalities                        | <b>Hematological findings:</b> 9/15 workers had at least 1 hematological abnormalities; large granular lymphocytes observed in 6; 4 presented w/ persistent hematologic abnormalities one year after acute exposure; no consistent patterns of correlation observed for hematological parameters                                                                                                                              |

|      |                        |                 |                                                     |                                                                  |                 |                                                                    |                                                                                                                                                                                                     |                                                                                               |                                                                                                             |
|------|------------------------|-----------------|-----------------------------------------------------|------------------------------------------------------------------|-----------------|--------------------------------------------------------------------|-----------------------------------------------------------------------------------------------------------------------------------------------------------------------------------------------------|-----------------------------------------------------------------------------------------------|-------------------------------------------------------------------------------------------------------------|
| [19] | Moro, 2015             | Cross-sectional | Gas station attendants                              | N=88; 60 exposed, 28 unexposed                                   | Brazil          | Personal passive samplers, blood BTX levels, urinary t,t-MA levels | <b>Exposed:</b><br>Air: 144.2 (58.1-2207.5) ug/m <sup>3</sup><br>Urinary: 334 (190-600) ug/gCr<br><b>Unexposed:</b><br>Air: 42.0 (34.1-52.4) ug/m <sup>3</sup><br>Urinary: 70.0 (50.0-120.0) ug/gCr | Hematological parameters, ALA-D activity, CD80 + CD86 expression, IL-8                        | ↓ ALA-D activity <sup>b</sup> , ↓ CD80 + CD86 expression <sup>a</sup> , ↑ IL-8 <sup>b</sup> , ↑ neutrophils |
| [66] | Moszczyński, 1996      | Cross-sectional | Workers exposed to organic solvents                 | N=139; 60 exposed, 79 unexposed                                  | Poland          | Air sampling; urinary phenol levels                                | <b>Air sampling:</b><br>TWA avg = 19 mg/m <sup>3</sup> (6 ppm)<br>Mean annual avg = 48 mg/m <sup>3</sup> (15 ppm)<br><b>Phenol:</b><br>Smokers: 16.8 ± 6.2 mg/l<br>Non-smokers: 18.4 ± 9.7 mg/l     | <b>Blood counts:</b> T-cells (CD3+), T-helper (CD4+), T-suppressor (CD8+), NK cells (CD16+)   | ↓ T-cells, ↓ NK cells, ↑ T-suppressor cells, ↓ T-helper/T-suppressor (CD4/CD8) ratio                        |
| [67] | Moszczyński, 1985      | Cross-sectional | Occupationally exposed workers                      | N=154; 108 exposed, 46 unexposed                                 | Poland          | Workplace air sampling; phenol in urine                            | <b>Air:</b> 0.370 mg/m <sup>3</sup><br><b>Phenol:</b> 16.2 ± 9.6 mg/l                                                                                                                               | NAG-positive lymphocyte count                                                                 | ↓ T-lymphocytes (exposure-dependent), ↓ in lymphocytes w/ intact NAG-positive lysosomes                     |
| [20] | Pelallo-Martinez, 2014 | Cross-sectional | Children living near petrochemical area             | N=105; 46 Allende, 38 Mundo Nuevo, 21 Lopez Mateos (all exposed) | Mexico          | Urinary t,t-MA levels                                              | Mean (range)<br><b>Allende:</b> 388 (44-1784) ug/gCr<br><b>Mundo Nuevo:</b> 363 (63-5521) ug/gCr<br><b>Lopez Mateos:</b> 369 (62-1414) ug/g Cr                                                      | <b>Genotoxicity:</b> DNA damage<br><b>Hematological effects:</b> WBC, Hb, HCT, RBC, platelets | <b>Lopez Mateos:</b> ↓ Hb <sup>a</sup> , ↓ HCT <sup>a</sup> , ↓ WBC, ↓ RBC                                  |
| [68] | Pitarque, 1996         | Cross-sectional | Service station attendants                          | N=93; 50 exposed, 43 unexposed                                   | Spain           | Personal air sampling; phenol urinary levels                       | <b>Air:</b> 8-h TWA: 0.91 ± 0.14 mg/m <sup>3</sup><br><b>Phenol:</b><br>Exposed: 5.06 ± 0.51 mg/gCr<br>Control: 3.73 ± 0.53 mg/gCr                                                                  | <b>Genetic damage:</b> MN<br><b>Hematological parameters:</b> differential WBC count          | No significant differences in MN and differential WBC counts between exposed and control populations        |
| [21] | Qu, 2002               | Cross-sectional | Factory workers (glue, shoe-making, sporting goods) | N=181; 130 exposed, 51 unexposed                                 | China (Tianjin) | Individual passive monitoring                                      | Median (range) = 3.2 (0.06-122) ppm daily                                                                                                                                                           | <b>Blood parameters:</b> RBC, platelets, WBC, neutrophils, lymphocytes, eosinophils, etc.     | Exposure-dependent: ↓ RBC <sup>b</sup> , ↓ WBC <sup>b</sup> , ↓ neutrophils <sup>p</sup>                    |

|      |                |                 |                                                       |                                                                                      |       |                                                                                                                                                                         |                                                                                                                                                                                                                                                                                                                               |                                                                                                                                                                                                        |                                                                                                                                                                                                                                                                                                                                                                             |
|------|----------------|-----------------|-------------------------------------------------------|--------------------------------------------------------------------------------------|-------|-------------------------------------------------------------------------------------------------------------------------------------------------------------------------|-------------------------------------------------------------------------------------------------------------------------------------------------------------------------------------------------------------------------------------------------------------------------------------------------------------------------------|--------------------------------------------------------------------------------------------------------------------------------------------------------------------------------------------------------|-----------------------------------------------------------------------------------------------------------------------------------------------------------------------------------------------------------------------------------------------------------------------------------------------------------------------------------------------------------------------------|
| [22] | Ray, 2007      | Cross-sectional | Petrol pump or automobile service workers             | N=85; 25 petrol pump attendants, 25 automobile service station workers, 35 unexposed | India | Urinary t,t-MA levels                                                                                                                                                   | <b>Exposed:</b> 2.72 ± 0.21 mg of t,t-MA/L<br><b>Unexposed:</b> 0.71 ± 0.11 mg/L                                                                                                                                                                                                                                              | Hematological parameters and lymphocyte subsets                                                                                                                                                        | <b>Hematological parameters:</b> ↓ RBC, ↓ Hb, ↓ lymphocyte, ↓ platelets, ↑ MCV, ↑ eosinophils, ↑ monocytes, ↑ immature neutrophil, ↑ band cells, ↑ RBC aniso-poikilocytosis and ↑ target cells, ↑ giant platelets<br><b>Lymphocyte subsets:</b> ↓ CD4+, CD8+, CD19+ cells, ↑ CD16+56+ NK cells<br><b>P-selectin expression on platelet surface:</b> ↑ P-selectin expression |
| [69] | Renzetti, 2009 | Cross-sectional | Untreated allergic children w/ mild persistent asthma | N=37                                                                                 | Italy | Fixed air quality monitoring stations in the city (hourly)                                                                                                              | Exposed: 3.9 ± 0.5 ug/m <sup>3</sup><br>Unexposed: 0.2 ± 0.1 ug/m <sup>3</sup>                                                                                                                                                                                                                                                | <b>Airway inflammation and airway function after relocation to rural area (days 0-7):</b> nasal eosinophils, FE <sub>NO</sub> from lower airways, peak expiratory flow (PEF), urinary LTE <sub>4</sub> | ↓ nasal eosinophils <sup>a</sup> , ↓ FE <sub>NO</sub> concentration, ↑ PEF <sup>b</sup>                                                                                                                                                                                                                                                                                     |
| [23] | Rothman, 1996a | Cross-sectional | Occupational factory workers                          | N=88; 44 exposed, 44 unexposed                                                       | China | Organic vapor passive dosimetry badge (worn for a full workshift, 5 days during 1 or 2 weeks before phelobotomy), BZ urinary metabolites (t,t-MA, phenol, catechol, HQ) | Median 8-hr TWA = 31 ppm<br><b>Urinary:</b><br>Exposed:<br><31ppm:<br>MA: 8.15 ug/mg<br>CA: 7.0 ug/mg<br>HQ: 12.8 ug/mg<br>Phenol: 38.9 ug/mg<br>>31ppm:<br>MA: 46.8 ug/mg<br>CA: 65.7 ug/mg<br>HQ: 64.3 ug/mg<br>Phenol: 349.7 ug/mg<br>Unexposed:<br>MA: 0.18 ug/mg<br>CA: 3.2 ug/mg<br>HQ: 1.6 ug/mg<br>Phenol: 17.3 ug/mg | <b>Hematological parameters:</b> WBC, lymphocyte, Hb, RBC, platelet, mean corpuscular volume, hematocrit                                                                                               | ↓ WBC, ↓ lymphocyte count <sup>a</sup> , platelets <sup>a</sup> , RBCs; ↑ MCV                                                                                                                                                                                                                                                                                               |

|      |                |                 |                                        |                                                                                                     |        |                                                                                                                                                                         |                                                                                                                                                              |                                                                                                                                                                                    |                                                                                                                                                                                                                                                                                                                                                                                                                                                                                                                                                         |
|------|----------------|-----------------|----------------------------------------|-----------------------------------------------------------------------------------------------------|--------|-------------------------------------------------------------------------------------------------------------------------------------------------------------------------|--------------------------------------------------------------------------------------------------------------------------------------------------------------|------------------------------------------------------------------------------------------------------------------------------------------------------------------------------------|---------------------------------------------------------------------------------------------------------------------------------------------------------------------------------------------------------------------------------------------------------------------------------------------------------------------------------------------------------------------------------------------------------------------------------------------------------------------------------------------------------------------------------------------------------|
| [24] | Rothman, 1996b | Cross-sectional | Occupational factory workers           | N=88; 44 exposed, 44 unexposed                                                                      | China  | Organic vapor passive dosimetry badge (worn for a full workshift, 5 days during 1 or 2 weeks before phelobotomy), BZ urinary metabolites (t,t-MA, phenol, catechol, HQ) | Median 8-hr TWA = 31 ppm<br><b>Urinary:</b><br>Exposed: MA: 33.0 ug/mg<br>Unexposed: MA: 0.3 ug/mg                                                           | <b>Hematological parameters:</b> WBC, lymphocyte, Hb, RBC, platelet, mean corpuscular volume, hematocrit<br><b>Cytokine Levels:</b> G-CSF, IL-6, erythropoietin, and TNF-a, IL-3   | ↓ WBC, lymphocyte count, platelets, RBCs, HCT; ↑ MCV; no significant difference in cytokine values (IL-3, IL-6, EPO, GMCSF, TNFa)                                                                                                                                                                                                                                                                                                                                                                                                                       |
| [25] | Samadi, 2019   | Cross-sectional | Adults exposed to an urban environment | N=219; 74 industrial, 74 high traffic, 71 low traffic                                               | Iran   | BTXS air sampling of industrial (28), high traffic (33), and low traffic areas (32) twice a day; Total: 18 stations, 93 air samples                                     | <b>Industrial:</b> 15.92 ± 8.15 ug/m <sup>3</sup><br><b>High traffic:</b> 7.33 ± 5.97 ug/m <sup>3</sup><br><b>Low traffic:</b> 2.08 ± 1.15 ug/m <sup>3</sup> | <b>Hematologic parameters:</b> WBC: neutrophils, eosinophils, monocytes, basophils, lymphocytes; RBC: Hb, HCT, MCV, MCHC, MCH)<br><b>Pro-inflammatory biomarkers:</b> TNF-α, IFN-γ | <b>Between industrial and low traffic area groups:</b> ↓ RBCs <sup>b</sup> , ↓ Hb, ↓ HCT <sup>a</sup> , ↑ WBC, ↑ neutrophils <sup>a</sup> , ↓ eosinophils, ↑ TNF-α <sup>a</sup> , ↑ IFN-γ <sup>a</sup><br><b>Between high and low traffic:</b> ↓ RBCs, ↑ TNF-α <sup>a</sup> , ↑ IFN-γ <sup>a</sup><br><b>Between industrial and high traffic:</b> ↑ MCHC <sup>a</sup> , ↑ neutrophils, ↓ eosinophils                                                                                                                                                    |
| [70] | Santiago, 2017 | Case report     | Gas station workers                    | N=2 (Case 1 8h/day, 6 days/week, 4years at a gas station; Case 2 48h/week, 9years at a gas station) | Brazil | Proxy (occupation)                                                                                                                                                      | Complex chromosomal rearrangements (CCR), NK cell count                                                                                                      |                                                                                                                                                                                    | <b>Case 1:</b> mild neutropenia, ↓ NK cells (all NK CD56+/CD16-), miscarriage in the first half of pregnancy, headache, dizziness, irritability, asthenia, changes in the thyroid gland, nodules in the right lobe, nonspecific pulmonary auscultation, found in 1/100 metaphases a CCR involving 8 chromosomal breakpoints, abnormal CD16 expression<br><b>Case 2:</b> one CCR found in 1/100 metaphases involving 3 breakpoint event, ↓ NK cells (all NK CD56+/CD16-)<br><b>Both:</b> CCRs. ↓ NK cells (all NK CD56+/CD16-), abnormal CD16 expression |

|      |                 |                 |                                                      |                                                                            |                 |                                                     |                                                                                                                                                                                                               |                                                                                                                                                                                 |                                                                                                                                                                                                                                                                                                                               |
|------|-----------------|-----------------|------------------------------------------------------|----------------------------------------------------------------------------|-----------------|-----------------------------------------------------|---------------------------------------------------------------------------------------------------------------------------------------------------------------------------------------------------------------|---------------------------------------------------------------------------------------------------------------------------------------------------------------------------------|-------------------------------------------------------------------------------------------------------------------------------------------------------------------------------------------------------------------------------------------------------------------------------------------------------------------------------|
| [71] | Sauer, 2018     | Cross-sectional | Gas station workers                                  | N=145; 74 exposed, 71 unexposed                                            | Brazil          | Personal passive samplers, urinary t,t-MA           | <b>Exposed:</b><br>Air: 0.216 (0.140-0.406) mg m <sup>-3</sup><br>Urinary: 243.7 (106.1 - 617.8) ug/gCr<br><b>Unexposed:</b><br>Air: 0.040 (0.0-0.09) mg m <sup>-3</sup><br>Urinary: 74.3 (40.9-114.9) ug/gCr | B7.1 + B7.2 protein and gene expression; C3+C4 serum levels, p53 gene expression                                                                                                | ↓ B7.1 /CD80 + B7.2/CD86 protein and mRNA expression <sup>b</sup> , ↓ C3 and C4 complement fraction levels <sup>b</sup>                                                                                                                                                                                                       |
| [26] | Schnatter, 2010 | Cross-sectional | Factory workers (rubber, shoe, insulation materials) | N=928; 855 exposed, 73 unexposed                                           | China           | Individual monitoring of a random sample of workers | Median (range) = 7.4 (0.07-872) mg/m <sup>3</sup>                                                                                                                                                             | <b>Hematological parameters:</b> WBCs, neutrophils, basophils, eosinophils, monocytes, lymphocytes, RBCs, Hb, MCV, RDW, platelets, MPV<br><b>SNPs:</b> NQO1, MPO, CYP2E1, GSTT1 | ↓ WBCs <sup>a</sup> , ↓ lymphocytes, ↓ monocytes, ↓ neutrophils, ↓ RBCs <sup>b</sup> , ↓ Hb <sup>b</sup> , ↓ MCV <sup>b</sup> , ↓ platelets <sup>a</sup> , ↓ MPV <sup>c</sup>                                                                                                                                                 |
| [72] | Shen, 2008      | Cross-sectional | BZ-exposed workers                                   | N=80; 40 exposed (20 in 1-10 ppm group, 20 in >10 ppm group), 40 unexposed | China (Tianjin) | Individual passive monitoring; urinary BZ levels    | <b>Air:</b><br>1-10 ppm: 5.06 ± 2.97 ppm<br>>10 ppm: 26.30 ± 19.16 ppm<br><b>Urine:</b><br>1-10 ppm: 99.76 ± 156.10 ug/L<br>>10 ppm: 820.82 ± 1253.27 ug/L                                                    | <b>mtDNA copy number</b><br><b>Blood cell counts:</b> WBC, granulocytes, lymphocytes, CD4+, CD8+, B cells, NK cells, monocytes, platelets, Hb                                   | <b>1-10 ppm:</b> ↓ WBC <sup>a</sup> , ↓ granulocytes <sup>a</sup> , ↓ CD4+, ↓ CD4+/CD8+ ratio <sup>b</sup> , ↓ platelets <sup>a</sup> , ↑ mtDNA<br><b>&gt;10 ppm:</b> ↓ WBC <sup>a</sup> , ↓ granulocytes <sup>a</sup> , ↓ CD4+, ↓ CD4+/CD8+ ratio <sup>b</sup> , ↓ B-cells <sup>b</sup> , ↓ platelets <sup>a</sup> , ↑ mtDNA |
| [73] | Singh, 2014     | Cross-sectional | Petrol pump workers                                  | N=94; 50 exposed, 40 unexposed                                             | India           | Proxy (occupation)                                  |                                                                                                                                                                                                               | Eosinophil count                                                                                                                                                                | ↓ in eosinophils according to years of exposure (1-5, 6-10, and >15, exception of those in the 11-15 years of exposure)                                                                                                                                                                                                       |
| [74] | Smolik, 1973    | Cross-sectional | Occupational workers                                 | N=79; 34 exposed (group 1), 45 unexposed (group 2)                         | Poland          | Area monitoring                                     | Group 1: 0.011-0.022 mg/L of air; Group 2: 0.003-0.02 mg/L                                                                                                                                                    | Serum complement level                                                                                                                                                          | ↓ Serum complement                                                                                                                                                                                                                                                                                                            |
| [75] | Spatari, 2015   | Cross-sectional | Oil refinery workers                                 | N=67; 51 exposed, 16 unexposed                                             | Italy           | Personal air sampling (during work shift of 8h)     |                                                                                                                                                                                                               | IL-10 serum levels                                                                                                                                                              | No significant difference between IL-10 in Groups A+B                                                                                                                                                                                                                                                                         |

|      |                     |                      |                                                              |                                        |             |                                                                 |                                                                                                                                                |                                                                                                                                                                         |                                                                                                                                                                                                                                                                                                    |
|------|---------------------|----------------------|--------------------------------------------------------------|----------------------------------------|-------------|-----------------------------------------------------------------|------------------------------------------------------------------------------------------------------------------------------------------------|-------------------------------------------------------------------------------------------------------------------------------------------------------------------------|----------------------------------------------------------------------------------------------------------------------------------------------------------------------------------------------------------------------------------------------------------------------------------------------------|
| [76] | Sukaisi, 2017       | Cross-sectional      | BZ-filling station workers                                   | N=43; 35 exposed, 8 unexposed          | Indonesia   | Urinary t,t-MA levels                                           | 587 ± 1326.5 ug/gCr                                                                                                                            | <b>Hematological parameters:</b> Examination of CD4+ and CD8+ T cells                                                                                                   | ↑ CD8+ T cells                                                                                                                                                                                                                                                                                     |
| [77] | Sul, 2005           | Cross-sectional      | Factory workers (printing, shoe-making, chemical production) | N=61; all exposed                      | South Korea | Breath BZ levels (personal sampler); t,t-MA and phenol in urine | <b>Breath:</b> 0.268 ± 0.216 (0.005-2.03) ppm<br><b>t,t-MA:</b> 1.02 ± 0.45 (0.24-2.77) mg/gCr<br><b>Phenol:</b> 10.9 ± 8.66 (2.5-46.6) mg/gCr | DNA damage, hematological parameters (secondary outcome) - WBC, neutrophils, lymphocyte, monocyte                                                                       | No statistically significant differences between worker groups (although no comparison to unexposed was investigated)                                                                                                                                                                              |
| [78] | Swaen, 2010         | Retrospective cohort | Dow employees with low BZ exposure                           | N=20705; 8532 exposed, 12173 unexposed | Netherlands | 21,584 BZ air measurements (8h TWA) - job exposure matrix       | Low concentrations of BZ                                                                                                                       | Hematological parameters                                                                                                                                                | ↓ eosinophils in stratified analysis and continuous analysis <sup>b</sup> but not in the categorical analysis<br>↑ monocytes in categorical <sup>b</sup> , continuous and stratified analysis                                                                                                      |
| [27] | Townsend, 1978      | Cross-sectional      | Employees                                                    | N=282; all exposed                     | N/A         | TWA estimates of benzene based on environmental measurements    | <b>Range:</b> <2 ppm TWA - 30 ppm TWA for periods of <1 yr - 20 yrs+                                                                           | <b>Blood chemistries:</b> bilirubin, creatinine, total protein, albumin, globulin, BUN, LDH, SGOT<br><b>Hematological parameters:</b> HCT, Hb, WBC, RBC, MCV, MCH, MCHC | ↓ RBC, ↓ bilirubin (not statistically significant)                                                                                                                                                                                                                                                 |
| [79] | Tsai, 2004          | Retrospective cohort | Employees that participated in the Shell BMSP                | N=4427; 1200 exposed, 3227 unexposed   | U.S.A       | Representative exposure monitoring data (personal sampling)     | <b>1977-1988 mean:</b> 0.60 ppm<br><b>After 1988 mean:</b> 0.14 ppm                                                                            | <b>Complete blood count:</b> WBC, RBC, lymphocyte, platelet, Hb, MCV                                                                                                    | ↓ MCV (no statistically significant changes)                                                                                                                                                                                                                                                       |
| [80] | Tunsaringkarn, 2013 | Cross-sectional      | Gasoline station workers                                     | N=102; all exposed                     | Thailand    | Urinary t,t-MA levels                                           | 1.45 ± 2.42 mg/gCr                                                                                                                             | <b>Hematological parameters:</b> Hb, HCT, MCV, WBC count, neutrophils, lymphocytes, monocytes, eosinophils, basophils, platelets                                        | Inverse correlation between urinary t,t-MA and Hb <sup>a</sup> ; inverse correlation between urinary t,t-MA and HCT <sup>a</sup> ; higher urinary t,t-MA (>0.5 mg/gCr) correlated with lower eosinophil counts                                                                                     |
| [28] | Uzma, 2008          | Cross-sectional      | Petrol filling workers                                       | N=78; 42 exposed, 36 unexposed         | India       | Proxy (occupation)                                              |                                                                                                                                                | Respiratory, hematological, and thyroid functions                                                                                                                       | <b>Hematological</b> ↑ RBCs and Hb (10-15, >15 years of exposure), ↓ WBC (except eosinophils and platelets - ↑ observed in eosinophil count according to yrs of exposure)<br><b>Thyroid:</b> ↑ T4, ↑ T4F, ↓ TSH, ↓ T3<br><b>Respiratory:</b> ↓ VC, ↓ FVC, ↓ IC, and ↓ FIVC (<10 years of exposure) |



|      |                  |                                                   |                                            |                                                                                     |                 |                                                                          |                                                                                                                                   |                                                                                                                                                                                                                              |                                                                                                                                                                                                                                                       |
|------|------------------|---------------------------------------------------|--------------------------------------------|-------------------------------------------------------------------------------------|-----------------|--------------------------------------------------------------------------|-----------------------------------------------------------------------------------------------------------------------------------|------------------------------------------------------------------------------------------------------------------------------------------------------------------------------------------------------------------------------|-------------------------------------------------------------------------------------------------------------------------------------------------------------------------------------------------------------------------------------------------------|
| [81] | Uzma, 2010       | Cross-sectional                                   | Gasoline filling workers                   | N=506; 428 exposed; 78 unexposed                                                    | India           | Individual air sampling; urinary BZ levels; blood BZ levels              | <b>Air:</b> 0.345 (0.118-0.527) ppm<br><b>Blood</b> (post-shift): 12.1 ± 5 nmol/L<br><b>Urine</b> (post-shift): 42.6 ± 1.2 nmol/L | <b>Oxidative stress:</b> ROS, MDA, SOD, GSH<br><b>Immune parameters:</b> CD4, CD8, IgG<br><b>mRNA expression:</b> p53                                                                                                        | <b>Oxidative stress:</b> ↑ ROS, ↑ MDA, ↓ SOD, ↓ GSH<br><b>Immune parameters:</b> ↓ CD4, ↓ CD4/CD8, ↓ IgG<br><b>mRNA expression:</b> ↑ p53                                                                                                             |
| [82] | Vermeulen, 2005  | Cross-sectional                                   | Shoe factory workers                       | N=20; 10 exposed workers, 10 controls                                               | China (Tianjin) | Personal passive monitoring                                              | 47.3 ± 24.3 ppm                                                                                                                   | Serum proteome                                                                                                                                                                                                               | ↓ 4.1 kDa protein, ↓ PF4, ↓ CTAP-III, ↓ PBP                                                                                                                                                                                                           |
| [83] | Wang, 2012       | Cross-sectional                                   | Spray paint workers                        | N=101; 46 directly exposed (group A), 26 indirectly exposed (group B), 29 unexposed | China           | Workplace air sampling (25 different locations of the spray-paint plant) | <b>Group A:</b> 0.21 ± 0.19 mg/m <sup>3</sup><br><b>Group B:</b> 0.06 ± 0.12 mg/m <sup>3</sup>                                    | <b>Hematological parameters:</b> CD4+, CD8+, NK, WBCs, Hb, platelets, B-cells, T-cells<br><b>mRNA expression:</b> Cell cycle regulatory genes: <i>p53, p21, Bax, Mdm-2, Rad51</i><br>DNA repair genes: <i>Xpc, Xpa, Ape1</i> | <b>Group A:</b> ↓ WBC, ↓ Hb, ↓ platelets <sup>a</sup> , ↓ CD8+, ↓ CD4+ <sup>a</sup> , ↓ T-cells, ↓ B-cells<br><b>Group B:</b> ↓ platelets <sup>a</sup> , ↓ CD8+ <sup>a</sup> , ↓ T-cells, ↓ B-cells                                                   |
| [29] | Ward, 1996       | Retrospective cohort (nested case-control design) | Rubber hydrochloride manufacturing workers | N=657 (all exposed)                                                                 |                 | Proxy (occupation)                                                       | Max daily BZ exposure = 34 ppm                                                                                                    | <b>Blood cell count:</b> WBC, RBC                                                                                                                                                                                            | ↓ WBCs (strong exposure-response); ↓ RBCs (weak exposure-response)                                                                                                                                                                                    |
| [84] | Wiwanitkit, 2004 | Cross-sectional                                   | Occupational workers                       | N=30 (all exposed)                                                                  | Thailand        | t,t-MA levels in urine                                                   | 0.71 (0-7.08) mg/gCr                                                                                                              | Platelet count                                                                                                                                                                                                               | No significant correlation between urine t,t-MA and platelet parameters (p > 0.05) although platelet count did decrease                                                                                                                               |
| [85] | Wu, 1998         | Cross-sectional                                   | Occupational workers                       | N=112; 29 low BZ, 29 high BZ, 25 BZ poisoning, 29 control                           | China           | Environmental monitoring of workplace; diagnosis of CBP                  | <b>Low BZ:</b> <300 mg/m <sup>3</sup><br><b>High BZ:</b> >300 mg/m <sup>3</sup>                                                   | <b>Hematological parameters:</b> WBC count, Hb, SOD<br><b>Lymphocyte DNA damage</b><br><b>Abs to Hsps</b>                                                                                                                    | <b>Hematological:</b> ↓ WBCs in BZ-poisoned compared to other three groups, ↑ SOD in BZ-poisoned compared to control<br><b>DNA damage:</b> ↑ DNA damage <sup>a</sup><br><b>Abs:</b> ↑ Abs against Hsp71 in BZ-poisoned compared to other three groups |
| [86] | Yaneva, 1998     | Prospective cohort                                | Sailors from chemical cargo tankers        | N=257; 179 exposed, 78 unexposed                                                    | Bulgaria        |                                                                          |                                                                                                                                   | <b>Hematological parameters:</b> RBCs, RBC morphology, HCT, Hb, WBCs, platelets                                                                                                                                              | No statistically significant difference between exp and ctrl group                                                                                                                                                                                    |

|      |                |                 |                     |                                 |      |                                                                                  |                                                                                                                   |                                                                                                       |
|------|----------------|-----------------|---------------------|---------------------------------|------|----------------------------------------------------------------------------------|-------------------------------------------------------------------------------------------------------------------|-------------------------------------------------------------------------------------------------------|
| [87] | Zamanian, 2018 | Cross-sectional | Gas station workers | N=160; 80 exposed, 80 unexposed | Iran | Interview-administered questionnaire to collect history of occupational exposure | <b>Blood parameters:</b> WBCs, neutrophils, lymphocytes, monocytes, leukocytes<br><b>Liver function:</b> AST, ALT | ↓ TLC <sup>b</sup> , ↑ lymphocyte <sup>b</sup> , ↑ monocyte <sup>b</sup> , ↑ neutrophils <sup>b</sup> |
|------|----------------|-----------------|---------------------|---------------------------------|------|----------------------------------------------------------------------------------|-------------------------------------------------------------------------------------------------------------------|-------------------------------------------------------------------------------------------------------|

Assume all mean differences are significant at  $p < 0.05$  unless marked below:

<sup>a</sup>The mean difference is significant at 0.01 (equal or less)

<sup>b</sup>The mean difference is significant at 0.001 (equal or less)

**Abbreviations:** a1-AT, alpha-1-antitrypsin; AACT, alpha-1-antichymotrypsin; Abs, antibodies; AEC, alveolar epithelial cells; ALP, alkaline phosphatase; ALT, alanine aminotransferase; apo, apolipoprotein; AST, aspartate transaminase; BMSP, Shell Benzene Medical Surveillance Program; BTEX, benzene, toluene, ethylbenzene, xylene; btwn, between; BTX, benzene, toluene, xylene; BUN, blood urea nitrogen; BZ, benzene; C3, complement 3; CA, chromosomal aberration; CAT, catechol; CBC, complete blood count; CC-16, clara cell protein; Cr, creatinine; CRP, C-reactive protein; Ctrl, control; ECP, eosinophil cationic protein; EPO, erythropoietin; Exp, exposed; FEF, forced expiratory flow; FEV, forced expiratory volume; FIVC, forced inspiratory vital capacity; FRAC, total ferric reducing antioxidant capacity; FVC, forced vital capacity; g, gram; gCr, gram creatinine; GLT<sub>50</sub>, measure of red cell fragility; GM-CSF, granulocyte-macrophage colony-stimulating factor; GS, gas station workers; GSH, glutathione; h, hour; Hb, hemoglobin; HCT, hematocrit; HQ, hydroquinone; Hsp71, heat shock protein 71; IC, inspiratory capacity; ICAM-1, intercellular adhesion molecule 1; Ig, immunoglobulin; L, liter; LDH, lactate dehydrogenase; LS, leather shoe factory workers; LTB<sub>4</sub>, leukotriene B<sub>4</sub>; max, maximum; mg, milligram; MCH, mean corpuscular hemoglobin; MCHC, mean corpuscular hemoglobin concentration; MCV, mean corpuscular volume; MDA, malondialdehyde; molCr, mole creatinine; MN, micronuclei; MPV, mean platelet volume; mtDNA, mitochondrial DNA; ng, nanogram; NK, natural killer; OR, odds ratio; PAH, polycyclic aromatic hydrocarbon; PAIg, platelet-associated antibody; PBP, platelet basic protein; PDW, platelet distribution width; PEF, peak expiratory flow rate; PF4, platelet factor 4; P-LCR, large platelet cell ratio; PLG, plasminogen; PM, particulate matter; ppm, parts per million; RBC, red blood cell; RDW, red blood cell distribution width; Ref, reference; ROS, reactive oxygen species; SCE, sister chromatid exchange; SGOT, serum glutamic-oxaloacetic transaminase; SNP, single nucleotide polymorphism; SOD, superoxide dismutase; SPMA, S-phenyl-mercapturic acid; T3, triiodothyronine; T4, thyroxine; T4F, free thyroxine; TBARS, thiobarbituric acid reactive substances; TLC, total leukocyte count; t,t-MA, trans,trans-muconic acid; TREC, T-cell receptor excision DNA circles; TSH, thyroid stimulating hormone; TWA, time-weighted average; ug, microgram; umol, micromole; unexp, unexposed; U.S.A., United States of America; VC, vital capacity; VOC, volatile organic compound; WBC, white blood cell; yrs, years.

**Table S5.** Summary of additional studies identified from an updated search in July, 2020.

| Ref #                            | Reference (Author, Year) | Study Type      | Population                               | Subject # (N)                                                              | Location | Exposure Assessment                                                              | Exposure Level                                                                                                                                                                                                                                                                                                                                                                                                                                                                         | Outcome                                                                                                                                                                              | Results                                                                                                                                |
|----------------------------------|--------------------------|-----------------|------------------------------------------|----------------------------------------------------------------------------|----------|----------------------------------------------------------------------------------|----------------------------------------------------------------------------------------------------------------------------------------------------------------------------------------------------------------------------------------------------------------------------------------------------------------------------------------------------------------------------------------------------------------------------------------------------------------------------------------|--------------------------------------------------------------------------------------------------------------------------------------------------------------------------------------|----------------------------------------------------------------------------------------------------------------------------------------|
| <b>KC6: Chronic Inflammation</b> |                          |                 |                                          |                                                                            |          |                                                                                  |                                                                                                                                                                                                                                                                                                                                                                                                                                                                                        |                                                                                                                                                                                      |                                                                                                                                        |
| [88]                             | Guo, 2019                | Cross-sectional | Factory workers (spraying lacquer)       | N=140; 69 exposed, 71 unexposed                                            | China    | General air sampling                                                             | 1.82 ± 1.16 mg/m <sup>3</sup>                                                                                                                                                                                                                                                                                                                                                                                                                                                          | <b>mRNA expression</b><br><b>Hematological:</b> WBC, neutrophils, lymphocytes, RBC, Hb, platelets, ALT                                                                               | <b>mRNA:</b> ↑ Caspase 1, ↑ IL-1β, ↑ TET2<br><b>Cytokines:</b> ↑ IL-1β, ↑ IL-8, ↓ IL-10                                                |
| <b>KC7: Immunosuppression</b>    |                          |                 |                                          |                                                                            |          |                                                                                  |                                                                                                                                                                                                                                                                                                                                                                                                                                                                                        |                                                                                                                                                                                      |                                                                                                                                        |
| [89]                             | Aksoy, 1971              | Cross-sectional | Shoe manufacturing workers               | N=317; 217 exposed, 100 unexposed                                          | Turkey   | Area monitoring                                                                  | 30-210 ppm                                                                                                                                                                                                                                                                                                                                                                                                                                                                             | <b>Hematological:</b> RBC, WBC, PCV, platelets, differential counts                                                                                                                  | ↓ leukocytes                                                                                                                           |
| [90]                             | Li, 2019                 | Cross-sectional | Benzene-exposed workers and CBP patients | N=500; 61 short-term exposed, 237 long-term exposed, 53 CBP, 149 unexposed | China    | Occupation<br>Diagnosis for CBP                                                  | Not reported                                                                                                                                                                                                                                                                                                                                                                                                                                                                           | Serological proteome analysis                                                                                                                                                        | ↑ Apo-AI, ↓ transthyretin                                                                                                              |
| [91]                             | Mukherjee, 2016          | Cross-sectional | Petrol pump workers<br>Traffic police    | N=93; 73 exposed (40 petrol pump workers, 33 traffic police), 20 unexposed | India    | General air sampling; individual passive monitoring; Urinary tt-MA + SPMA levels | <b>Exp:</b><br><i>Petrol pump workers:</i><br>Static air: 86.5 ± 54.4 ug/m <sup>3</sup><br>Personal exp: 195.3 ± 184.4 ug/m <sup>3</sup><br>tt-MA: 1.10 ± 1.08 mg/gCr<br>SPMA: 1.70 ± 1.69 mg/gCr<br><i>Traffic police:</i><br>Static air: 56.6 ± 35.6 ug/m <sup>3</sup><br>Personal exp: 104.6 ± 99.0 ug/m <sup>3</sup><br>tt-MA: 0.46 ± 0.31 mg/gCr<br>SPMA: 0.91 ± 0.64 mg/gCr<br><b>Ctrl:</b><br>tt-MA: 0.36 tt-MA: 1.10 ± 1.08 mg/gCr<br>SPMA: 1.70 ± 0.20 mg/gCr<br>SPMA: 0.73 ± | <b>Hematological:</b> Hb, TLC, differential leucocytes count, RBC, platelet, HCT, reticulocyte count<br><b>Porphyrin Tests:</b> Serum ALA and PBG<br><b>Pulmonary function tests</b> | <b>Hematological:</b> ↓ platelets, ↑ lymphocytes, ↑ eosinophils, ↓ decreased neutrophils<br><b>Porphyrin Tests:</b> ↑ PBG <sup>a</sup> |

0.56 mg/gCr

|      |                         |                 |                                          |                                |        |                                                                                                          |                                                                                                                     |                                                                                                                                          |                                                                                                                                                                                                                                                                                                                                                              |
|------|-------------------------|-----------------|------------------------------------------|--------------------------------|--------|----------------------------------------------------------------------------------------------------------|---------------------------------------------------------------------------------------------------------------------|------------------------------------------------------------------------------------------------------------------------------------------|--------------------------------------------------------------------------------------------------------------------------------------------------------------------------------------------------------------------------------------------------------------------------------------------------------------------------------------------------------------|
| [92] | Ren, 2020               | Cross-sectional | CBP patients (all factory workers)       | N=44; 21 exposed, 23 unexposed | China  | General air sampling (samples were collected within the breathing zone of the workers three times a day) | 0.09 - 5 mg/m <sup>3</sup>                                                                                          | <b>Genome-wide methylation</b><br><b>Micronuclei frequency</b><br><b>Hematological:</b> WBC, RBC, Hb, platelet, neutrophils, lymphocytes | <b>Methylation:</b> ↑ promoter methylation for CSF3Ra and F2R genes; ↓ neutrophil percentage in high CSF3R-methylation group compared to low CSF3R-methylation group<br><b>↑ MN Frequency</b><br><b>Hematological:</b> ↓ WBC, ↓ RBC, ↓ Hb, ↓ platelets, ↓ neutrophils<br>Smoke exp: ↓ HCT <sup>a</sup> , ↓ Hb <sup>b</sup> , ↓ platelets, ↓ WBC <sup>b</sup> |
| [93] | Vaughan<br>Watson, 2020 | Cohort          | NHANES participants with VOC lab results | N-9203                         | U.S.A. | Blood VOC laboratory analysis                                                                            | Mean (95% CI)<br><b>Smoke exp:</b><br>0.148 (0.137, 0.16) ng/mL<br><b>Smoke unexp:</b><br>0.021 (0.02, 0.022) ng/mL | <b>Hematological:</b> WBC, eosinophils, RBC, Hb, HCT, platelets                                                                          | Smoke exp: ↓ HCT <sup>a</sup> , ↓ Hb <sup>b</sup> , ↓ platelets, ↓ WBC <sup>b</sup>                                                                                                                                                                                                                                                                          |

Note: These studies were identified from an updated PubMed search in July, 2020. We reviewed 182 studies and identified 6 new relevant studies.

Assume all mean differences are significant at  $p < 0.05$  unless marked below:

<sup>a</sup>The mean difference is significant at 0.01 (equal or less)

<sup>b</sup>The mean difference is significant at 0.001 (equal or less)

**Abbreviations:** ALA, Delta-aminolevulinic acid; ALT, alanine aminotransferase; apo, apolipoprotein; CBP, chronic benzene poisoning; Ctrl, control; Exp, exposed; gCr, gram creatinine; Hb, hemoglobin; HCT, hematocrit; IL, interleukin; mL, milliliter; mg, milligram; MN, micronuclei; ng, nanogram; NHANES, National Health and Nutrition Examination Survey; PBG, porphobilinogen; PCV, packed cell volume; ppm, parts per million; RBC, red blood cell; Ref, reference; SPMA, S-phenyl-mercapturic acid; TET2, Tet methylcytosine dioxygenase 2; TLC, total leukocyte count; t,t-MA, trans,trans-muconic acid; ug, microgram; unexp, unexposed; U.S.A., United States of America; VOC, volatile organic compound; WBC, white blood cell.

**Table S6.** Major outcomes from benzene hematotoxicity studies in exposed people.

| Hematotoxicity | Results                                                                                                                                                                                          |                                                                                                                                                                               |                                                                                                                                                                                                                                                                                                                                                                                                                                                                                                                               |
|----------------|--------------------------------------------------------------------------------------------------------------------------------------------------------------------------------------------------|-------------------------------------------------------------------------------------------------------------------------------------------------------------------------------|-------------------------------------------------------------------------------------------------------------------------------------------------------------------------------------------------------------------------------------------------------------------------------------------------------------------------------------------------------------------------------------------------------------------------------------------------------------------------------------------------------------------------------|
|                | Increase                                                                                                                                                                                         | No association                                                                                                                                                                | Decrease                                                                                                                                                                                                                                                                                                                                                                                                                                                                                                                      |
| Mixed lineage  |                                                                                                                                                                                                  |                                                                                                                                                                               |                                                                                                                                                                                                                                                                                                                                                                                                                                                                                                                               |
| WBC            | D'Andrea (2014b)[43], D'Andrea (2016)[44], D'Andrea (2017)[45], D'Andrea (2013a)[40], Doherty (2017)[5], Froom (1994)[47], Haufroid (1997)[50], Hristeva-Mirtcheva (1998)[51], Samadi (2019)[25] | Hancock (1984)[48], Pitarque (1996)[68], Yaneva (1998)[86], Sul (2005)[77]                                                                                                    | Uzma (2008)[28], Wang (2012)[83], Ward (1996)[29], Wu (1998)[85], Zamanian (2018)[87], Bassig (2016)[34], Biro (2002)[35], Bogadi-Sare (1997)[3], Schnatter (2010)[26], Rothman (1996a)[23], Rothman (1996b)[24], Shen (2008)[72], Casale (2016)[38], Cody (1993)[39], D'Andrea (2014a)[42], Huang (2012)[52], Li (2009a)[15], Ibrahim (2014)[12], Kipen (1988)[56], Kamal (2012)[54], Li (2018)[63], Pelallo-Martinez (2014)[20], Qu (2002)[21], Lan (2004)[59], Aksoy (1971)[89], Ren (2020)[92], Vaughan Watson (2020)[93] |
| CBC            |                                                                                                                                                                                                  | Hancock (1984)[48], Spatari (2015)[75], Sul (2005)[77], Swaen (2010)[78], Koh (2015)[58], Hotz (1998)[11], Townsend (1978)[27], Erdei (2003)[46], Wiwanitkit (2004)[84], Tsai |                                                                                                                                                                                                                                                                                                                                                                                                                                                                                                                               |

|                             |                                                                                                                                                   |                                     |                                                                                                                                                                                                                                                    |
|-----------------------------|---------------------------------------------------------------------------------------------------------------------------------------------------|-------------------------------------|----------------------------------------------------------------------------------------------------------------------------------------------------------------------------------------------------------------------------------------------------|
|                             |                                                                                                                                                   | (2004)[79],<br>Yaneva<br>(1998)[86] |                                                                                                                                                                                                                                                    |
| Hematological abnormalities | Midzenski<br>(1992)[65]                                                                                                                           |                                     |                                                                                                                                                                                                                                                    |
| Myeloid lineage             |                                                                                                                                                   |                                     |                                                                                                                                                                                                                                                    |
| Granulocytes                |                                                                                                                                                   |                                     | Bassig (2016)[34], Shen<br>(2008)[72], Lan<br>(2004)[59]                                                                                                                                                                                           |
| Neutrophils                 | Samadi<br>(2019)[25],<br>Dutta<br>(2013)[6],<br>Zamanian<br>(2018)[87],<br>Haufroid<br>(1997)[50],<br>Doherty<br>(2017)[5],<br>Moro<br>(2015)[19] |                                     | Casale (2016)[38],<br>Hristeva-Mirtcheva<br>(1998)[51], Huang<br>(2012)[52], Chen<br>(2019)[4], Qu (2002)[21],<br>Schnatter (2010)[26], Li<br>(2018)[63], Bogadi-Sare<br>(1997)[3], Biro<br>(2002)[35], Mukherjee<br>(2016)[91], Ren<br>(2020)[92] |
| Eosinophils                 | Dutta<br>(2013)[6], Ray<br>(2007)[22],<br>Uzma<br>(2008)[28], Li<br>(2019)[64],<br>Mukherjee<br>(2016)[91]                                        |                                     | Barman (2016)[33],<br>Samadi (2019)[25],<br>Swaen (2010)[78], Singh<br>(2014)[73],<br>Tunsaringkarn<br>(2013)[80], Harati<br>(2017)[49], Renzetti<br>(2009)[69]                                                                                    |
| Basophils                   | Chen<br>(2019)[4],<br>Haufroid<br>(1997)[50], Li<br>(2019)[64]                                                                                    |                                     |                                                                                                                                                                                                                                                    |
| Monocytes                   | Chen<br>(2019)[4],<br>Doherty<br>(2017)[5],<br>Haufroid<br>(1997)[50],<br>Swaen<br>(2010)[78],<br>Zamanian<br>(2018)[87],<br>Ray (2007)[22]       |                                     | Li (2018)[63], Schnatter<br>(2010)[26]                                                                                                                                                                                                             |

|                  |                                                                                                            |                                       |                                                                                                                                                                                                                                                                                                                                     |
|------------------|------------------------------------------------------------------------------------------------------------|---------------------------------------|-------------------------------------------------------------------------------------------------------------------------------------------------------------------------------------------------------------------------------------------------------------------------------------------------------------------------------------|
| Macrophages      | Dutta (2013)[6]                                                                                            |                                       |                                                                                                                                                                                                                                                                                                                                     |
| RBCs             | Doherty (2017)[5], Liang (2018)[16], Uzma (2008)[28]                                                       | Hancock (1984)[48], Yaneva (1998)[86] | Samadi (2019)[25], Rothman (1996a)[23], Ray (2007)[22], Ibrahim (2014)[12], Pelallo-Martinez (2014)[20], Qu (2002)[21], Schnatter (2010)[26], Rothman (1996b)[24], Chen (2019)[4], Haufroid (1997)[50], Kamal (2012)[54], Li (2009a)[15], Townsend (1978)[27], Ward (1996)[29], Huang (2012)[52], Ren (2020)[92]                    |
| Platelets        | D'Andrea (2013a)[40], D'Andrea (2014a)[42], D'Andrea (2014b)[43], D'Andrea (2016)[44], D'Andrea (2017)[45] | Wiwanitkit (2004)[84]                 | Kasemy (2019)[55], Schnatter (2010)[26], Wang (2012)[83], Shen (2008)[72], Chen (2019)[4], Rothman (1996a)[23], Rothman (1996b)[24], Ray (2007)[22], Bassig (2016)[34], Huang (2012)[52], Li (2009a)[15], D'Andrea (2013b)[41], Lan (2004)[59], Ibrahim (2014)[12], Mukherjee (2016)[91], Ren (2020)[92], Vaughan Watson (2020)[93] |
| Lymphoid lineage |                                                                                                            |                                       |                                                                                                                                                                                                                                                                                                                                     |
| Lymphocytes      | Doherty (2017)[5], Dutta (2013)[6], Haufroid (1997)[50], Zamanian (2018)[87], Mukherjee                    | Erdei (2003)[46]                      | Bogadi-Sare (1997)[3], Bassig (2016)[34], Rothman (1996a)[23], Rothman (1996b)[24], Casale (2016)[38], Ray (2007)[22], Schnatter (2010)[26], Li (2018)[63], Lan (2004)[59]                                                                                                                                                          |

|                       |                    |  |                                                                                                                                           |
|-----------------------|--------------------|--|-------------------------------------------------------------------------------------------------------------------------------------------|
|                       | (2016)[91]         |  |                                                                                                                                           |
| B-lymphocytes         |                    |  | Bogadi-Sare (2000)[36], Wang (2012)[83], Bassig (2016)[34], Shen (2008)[72], Lan (2004)[59]                                               |
| T-lymphocytes         |                    |  | Wang (2012)[83], Moszczynski (1985)[67], Moszczynski (1996)[66]                                                                           |
| CD4+ T-lymphocytes    |                    |  | Bassig (2016)[34], Kirkeleit (2006)[57], Li (2012)[62], Ray (2007)[22], Uzma (2010)[81], Wang (2012)[83], Lan (2004)[59], Shen (2008)[72] |
| CD8+ T-lymphocytes    | Sukaisi (2017)[76] |  | Ray (2007)[22], Wang (2012)[83]                                                                                                           |
| CD4+/CD8+T-cell ratio |                    |  | Shen (2008)[72], Uzma (2010)[81], Bassig (2016)[34], Li (2012)[62], Moszczynski (1996)[66], Lan (2004)[59]                                |
| NK cells              |                    |  | Bassig (2016)[34], Moszczynski (1996)[66], Santiago (2017)[70], Lan (2004)[59]                                                            |

Abbreviations: CBC, complete blood count; NK cells, natural killer cells; RBC, red blood cell; WBC, white blood cell



## **Benzene-Induced Hematotoxicity Outcomes**

### **1. White blood cells**

Many studies investigating the association between benzene exposure and altered blood cell counts demonstrate evidence of hematological suppression in exposed humans. A summary of the hematotoxicity outcomes observed can be found in **Table S6** above.

In particular, white blood cell (WBC) counts seem to be the most affected as a total of 27 studies have reported lower overall WBCs.[3, 12, 15, 20, 21, 23, 24, 26, 28, 29, 34, 35, 38, 39, 42, 52, 54, 56, 59, 63, 72, 83, 85, 87, 89, 92, 93] A much smaller number of studies reported an increase in overall WBC count,[5, 25, 40, 43-45, 47, 50, 51] and four studies reported no significant change.[48, 68, 77, 86]

WBC subsets were also observed in several studies. Three studies reported a decrease in granulocyte count.[34, 59, 72] Seven studies reported a significant decrease in eosinophil count in association with benzene exposure,[25, 33, 49, 69, 73, 78, 80] although five studies indicated an increase[6, 22, 28, 64, 91] and another study indicated no change.[4] For neutrophils, eleven studies reported a decrease,[3, 4, 21, 26, 35, 38, 51, 52, 63, 91, 92] but a separate six studies reported an increase.[5, 6, 19, 25, 50, 87]

The majority of studies have documented lower absolute lymphocyte levels in benzene-exposed humans,[3, 22-24, 26, 34, 38, 59, 63] although a few studies have reported an increase[5, 6, 50, 87, 91] and one study indicated no change.[46] Specifically, numbers of circulating B-lymphocytes[34, 36, 59, 72, 83] and T-lymphocytes[66, 67, 83] were decreased. In particular, CD4<sup>+</sup> T-lymphocytes were observed to decrease in all studies,[22, 34, 57, 59, 62, 72, 81, 83]. The results were slightly mixed in regards to CD8<sup>+</sup> T-lymphocytes with one study observing an increase in CD8<sup>+</sup> T-lymphocytes,[76] two studies observing a decrease,[22, 83]. Several studies also reported a decrease in the CD4<sup>+</sup>/CD8<sup>+</sup> T cell ratio,[34, 59, 62, 66, 72, 81] which could indicate altered or suppressed immune function as the CD4<sup>+</sup>/CD8<sup>+</sup> ratio test is most commonly used to detect AIDS (acquired immunodeficiency syndrome).[94] Four studies also reported an overall decrease in natural killer (NK) cells.[34, 59, 66, 70]

In the case of increased white blood cell counts, one study reported an increase in macrophages[6] and three studies reported an overall increase in basophils.[4, 50, 64] Six studies also reported an increase in monocytes,[4, 5, 22, 50, 78, 87] although another two studies reported a decrease.[26, 63]

There have also been a few studies that have revealed no statistically significant differences in complete blood cell counts examined.[11, 27, 46, 48, 58, 75, 77-79, 84, 86]

Finally, one study has reported unique hematological abnormalities in 15 shipyard workers from the U.S. By observing cells with peripheral blood smears, the study reported that 9 out of the 15 workers exhibited at least one hematologic abnormality and that 6 out of the 15 peripheral blood smears contained numerous large granular lymphocytes, indicating proliferation of cytotoxic T cells.[65]

### **2. Platelets**

Platelets are traditionally known as having only one function: hemostasis and thrombosis (blood clotting). Recently, however, evidence has accumulated that suggests a potential role for platelets in elements of the immunological response. In particular, data suggests that platelets could play a role in

inflammation by releasing cytokines and chemokines to attract neutrophils, monocytes, and lymphocytes to sites of infection.[95] Additionally, studies have shown that platelets can function as immune cells by engulfing microbes, such as HIV and bacteria.[96, 97] Thus platelet count could be an indicator of immune system dysfunction or deficiency.

In relation to benzene exposure, 17 studies reported a decrease in platelet count,[4, 12, 15, 22-24, 26, 34, 41, 52, 55, 59, 72, 83, 91-93] five studies reported an increase,[40, 42-45] and one study reported no change.[84]

Many studies reporting on hematological parameters also observed changes in mean corpuscular volume and hemoglobin count, although these results are not included here since as of our current scientific understanding, the two measures do not correlate with inflammatory or immunosuppressive outcomes.

### **3. Red blood cells**

A large number of studies reported a *decrease in red blood cells (RBC)*. [4, 12, 15, 20-27, 29, 50, 52, 54] RBCs typically play a role in oxygen transport to the various tissues of our body. Although RBCs do not play a direct role in the immune system, recent studies have revealed an emerging role for erythrocytes as modulators of innate immunity and cytokine signaling.[98, 99] This suggests that a lack of RBCs could play a role in the immune response to benzene exposure. A separate three studies reported an increase in RBCs.[5, 16, 28]

**Figure S1.** Summary of observed chronic inflammation, immunosuppression, and hematotoxicity outcomes in association with benzene exposure.

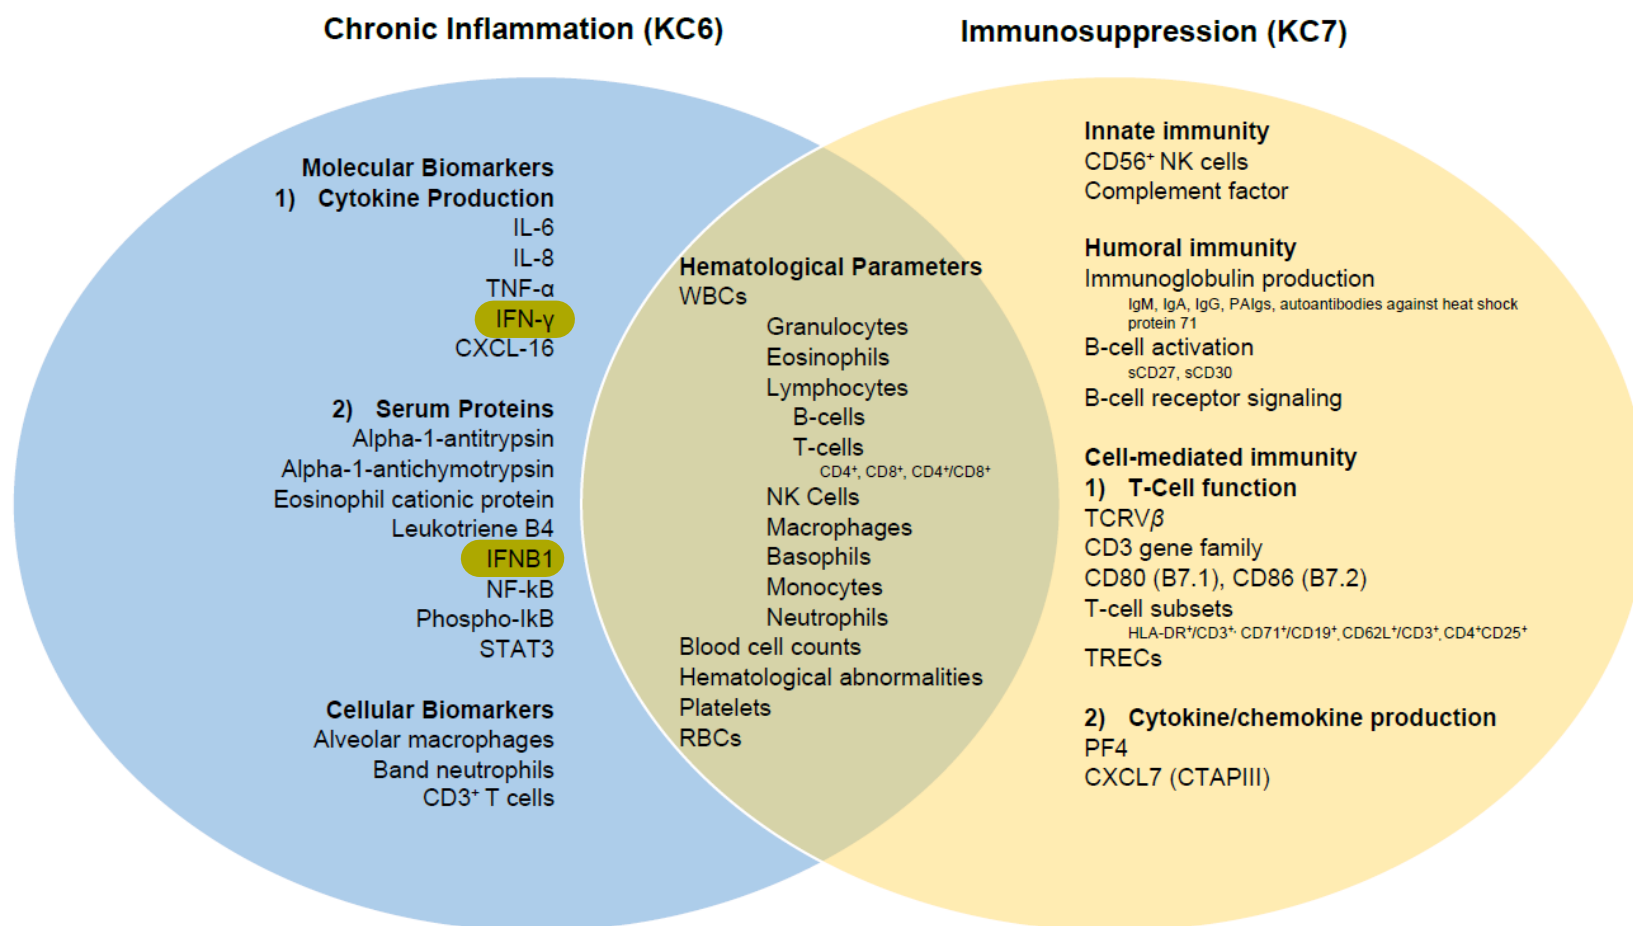

Abbreviations: CTAP III, connective tissue-activating peptide III; CXCL, CXC chemokine ligand; HLA-DR, human leukocyte antigen-DR isotype; IFN, interferon; Ig, immunoglobulin; IL, interleukin; NAG, N-acetyl-beta-glucosamine; NF-kB, nuclear factor kappa-light-chain-enhancer of activated B cells; NK cells, natural killer cells; PAIgs, platelet-associated immunoglobulins; PF4, platelet factor 4; RBC, red blood cell; sCD, soluble CD; STAT3, signal transducer and activators of transcription 3; TCRV $\beta$ , variable  $\beta$ -domain of T-cell receptors; TNF- $\alpha$ , tumor necrosis factor alpha; TRECs, T-cell receptor excision circles

## References

1. Smith MT, Guyton KZ, Gibbons CF, et al. Key Characteristics of Carcinogens as a Basis for Organizing Data on Mechanisms of Carcinogenesis. *Environ Health Perspect.* 2016;124(6):713-21.
2. IARC. Benzene. *IARC Monographs on the Evaluation of Carcinogenic Risks to Humans.* 2018;120:307.
3. Bogadi-Sare A, Turk R, Karacic V, et al. Red blood cell glycerol lysis and hematologic effects in occupational benzene exposure. *Toxicol Ind Health.* 1997;13(4):485-94.
4. Chen Q, Sun H, Zhang J, et al. The hematologic effects of BTEX exposure among elderly residents in Nanjing: a cross-sectional study. *Environ Sci Pollut Res Int.* 2019;26(11):10552-61.
5. Doherty BT, Kwok RK, Curry MD, et al. Associations between blood BTEXS concentrations and hematologic parameters among adult residents of the U.S. Gulf States. *Environ Res.* 2017;156:579-87.
6. Dutta A, Roychoudhury S, Chowdhury S, et al. Changes in sputum cytology, airway inflammation and oxidative stress due to chronic inhalation of biomass smoke during cooking in premenopausal rural Indian women. *Int J Hyg Environ Health.* 2013;216(3):301-8.
7. Elango N, Kasi V, Vembhu B, et al. Chronic exposure to emissions from photocopiers in copy shops causes oxidative stress and systematic inflammation among photocopier operators in India. *Environ Health.* 2013;12(1):78.
8. Fenga C, Gangemi S, Giambo F, et al. Low-dose occupational exposure to benzene and signal transduction pathways involved in the regulation of cellular response to oxidative stress. *Life Sci.* 2016;147:67-70.
9. Forrest MS, Lan Q, Hubbard AE, et al. Discovery of novel biomarkers by microarray analysis of peripheral blood mononuclear cell gene expression in benzene-exposed workers. *Environ Health Perspect.* 2005;113(6):801-7.
10. Haro-Garcia LC, Juarez-Perez CA, Aguilar-Madrid G, et al. Production of IL-10, TNF and IL-12 by peripheral blood mononuclear cells in Mexican workers exposed to a mixture of benzene-toluene-xylene. *Arch Med Res.* 2012;43(1):51-7.
11. Hotz P, Carbonnelle P, Scheiff JM, et al. Interleukin 1 alpha hematological examination in mechanics exposed to low benzene concentrations. *Int Arch Occup Environ Health.* 1998;71(1):19-28.
12. Ibrahim KS, Amer NM, El-dossuky EA, et al. Hematological effect of benzene exposure with emphasis of muconic acid as a biomarker. *Toxicol Ind Health.* 2014;30(5):467-74.
13. Jorgensen KM, Faergestad Mosleth E, Hovde Liland K, et al. Global Gene Expression Response in Peripheral Blood Cells of Petroleum Workers Exposed to Sub-Ppm Benzene Levels. *Int J Environ Res Public Health.* 2018;15(11).
14. Lehmann I, Rehwagen M, Diez U, et al. Enhanced in vivo IgE production and T cell polarization toward the type 2 phenotype in association with indoor exposure to VOC: results of the LARS study. *Int J Hyg Environ Health.* 2001;204(4):211-21.
15. Li B, Li YQ, Yang LJ, et al. Decreased T-cell receptor excision DNA circles in peripheral blood mononuclear cells among benzene-exposed workers. *Int J Immunogenet.* 2009;36(2):107-11.
16. Liang B, Zhong Y, Chen K, et al. Serum plasminogen as a potential biomarker for the effects of low-dose benzene exposure. *Toxicology.* 2018;410:59-64.
17. McHale CM, Zhang L, Lan Q, et al. Changes in the peripheral blood transcriptome associated with occupational benzene exposure identified by cross-comparison on two microarray platforms. *Genomics.* 2009;93(4):343-9.
18. McHale CM, Zhang L, Lan Q, et al. Global gene expression profiling of a population exposed to a range of benzene levels. *Environ Health Perspect.* 2011;119(5):628-34.
19. Moro AM, Brucker N, Charao MF, et al. Early hematological and immunological alterations in gasoline station attendants exposed to benzene. *Environ Res.* 2015;137:349-56.

20. Pelallo-Martinez NA, Batres-Esquivel L, Carrizales-Yanez L, et al. Genotoxic and hematological effects in children exposed to a chemical mixture in a petrochemical area in Mexico. *Arch Environ Contam Toxicol*. 2014;67(1):1-8.
21. Qu Q, Shore R, Li G, et al. Hematological changes among Chinese workers with a broad range of benzene exposures. *Am J Ind Med*. 2002;42(4):275-85.
22. Ray MR, Roychoudhury S, Mukherjee S, et al. Occupational benzene exposure from vehicular sources in India and its effect on hematology, lymphocyte subsets and platelet P-selectin expression. *Toxicol Ind Health*. 2007;23(3):167-75.
23. Rothman N, Li GL, Dosemeci M, et al. Hematotoxicity among Chinese workers heavily exposed to benzene. *Am J Ind Med*. 1996;29(3):236-46.
24. Rothman N, Smith MT, Hayes RB, et al. An epidemiologic study of early biologic effects of benzene in Chinese workers. *Environ Health Perspect*. 1996;104 Suppl 6:1365-70.
25. Samadi MT, Shakerkhatibi M, Poorolajal J, et al. Association of long term exposure to outdoor volatile organic compounds (BTXS) with pro-inflammatory biomarkers and hematologic parameters in urban adults: A cross-sectional study in Tabriz, Iran. *Ecotoxicol Environ Saf*. 2019;180:152-9.
26. Robert Schnatter A, Kerzic PJ, Zhou Y, et al. Peripheral blood effects in benzene-exposed workers. *Chem Biol Interact*. 2010;184(1-2):174-81.
27. Townsend JC, Ott MG, Fishbeck WA. Health exam findings among individuals occupationally exposed to benzene. *J Occup Med*. 1978;20(8):543-8.
28. Uzma N, Salar BM, Kumar BS, et al. Impact of organic solvents and environmental pollutants on the physiological function in petrol filling workers. *Int J Environ Res Public Health*. 2008;5(3):139-46.
29. Ward E, Hornung R, Morris J, et al. Risk of low red or white blood cell count related to estimated benzene exposure in a rubberworker cohort (1940-1975). *Am J Ind Med*. 1996;29(3):247-57.
30. Yang J, Bai W, Niu P, et al. Aberrant hypomethylated STAT3 was identified as a biomarker of chronic benzene poisoning through integrating DNA methylation and mRNA expression data. *Exp Mol Pathol*. 2014;96(3):346-53.
31. Zhang Z, Li P, Lin D, et al. Proteome analysis of the potential serum biomarkers for chronic benzene poisoning. *Environ Toxicol Pharmacol*. 2018;60:157-64.
32. Baiz N, Slama R, Bene MC, et al. Maternal exposure to air pollution before and during pregnancy related to changes in newborn's cord blood lymphocyte subpopulations. The EDEN study cohort. *BMC Pregnancy Childbirth*. 2011;11:87.
33. Barman B, Baishya R, Bora B. A comparative study of pulmonary function and eosinophil count in petrol pump workers in Kamrup Metro district in relation to chronic inhalation of petroleum derivatives. *International Journal of Scientific Research*. 2016;5(12):56-8.
34. Bassig BA, Zhang L, Vermeulen R, et al. Comparison of hematological alterations and markers of B-cell activation in workers exposed to benzene, formaldehyde and trichloroethylene. *Carcinogenesis*. 2016;37(7):692-700.
35. Biro A, Pallinger E, Major J, et al. Lymphocyte phenotype analysis and chromosome aberration frequency of workers occupationally exposed to styrene, benzene, polycyclic aromatic hydrocarbons or mixed solvents. *Immunol Lett*. 2002;81(2):133-40.
36. Bogadi-Sare A, Zavalic M, Trosic I, et al. Study of some immunological parameters in workers occupationally exposed to benzene. *Int Arch Occup Environ Health*. 2000;73(6):397-400.
37. Boscolo P, Di Gioacchino M, Sabbioni E, et al. Lymphocyte subpopulations, cytokines and trace elements in asymptomatic atopic women exposed to an urban environment. *Life Sci*. 2000;67(10):1119-26.
38. Casale T, Sacco C, Ricci S, et al. Workers exposed to low levels of benzene present in urban air: Assessment of peripheral blood count variations. *Chemosphere*. 2016;152:392-8.
39. Cody RP, Strawderman WW, Kipen HM. Hematologic effects of benzene. Job-specific trends during the first year of employment among a cohort of benzene-exposed rubber workers. *J Occup Med*. 1993;35(8):776-82.

40. D'Andrea MA, Singh O, Reddy GK. Health consequences of involuntary exposure to benzene following a flaring incident at British Petroleum refinery in Texas City. *American journal of disaster medicine*. 2013;8(3):169-79.
41. D'Andrea MA, Reddy GK. Health consequences among subjects involved in Gulf oil spill clean-up activities. *The American journal of medicine*. 2013;126(11):966-74.
42. D'Andrea MA, Reddy GK. Health effects of benzene exposure among children following a flaring incident at the British Petroleum Refinery in Texas City. *Pediatr Hematol Oncol*. 2014;31(1):1-10.
43. D'Andrea MA, Reddy GK. Hematological and hepatic alterations in nonsmoking residents exposed to benzene following a flaring incident at the British petroleum plant in Texas City. *Environ Health*. 2014;13:115.
44. D'Andrea MA, Reddy GK. Detrimental Health Effects of Benzene Exposure in Adults After a Flaring Disaster at the BP Refinery Plant in Texas City. *Disaster medicine and public health preparedness*. 2016;10(2):233-9.
45. D'Andrea MA, Reddy GK. Benzene exposure from the BP refinery flaring incident alters hematological and hepatic functions among smoking subjects. *International journal of occupational medicine and environmental health*. 2017;30(6):849-60.
46. Erdei E, Bobvos J, Brozik M, et al. Indoor air pollutants and immune biomarkers among Hungarian asthmatic children. *Arch Environ Health*. 2003;58(6):337-47.
47. Froom P, Dyerassi L, Cassel A, et al. Erythropoietin-independent colonies of red blood cells and leukocytosis in a worker exposed to low levels of benzene. *Scand J Work Environ Health*. 1994;20(4):306-8.
48. Hancock DG, Moffitt AE, Jr., Hay EB. Hematological findings among workers exposed to benzene at a coke oven by-product recovery facility. *Arch Environ Health*. 1984;39(6):414-8.
49. Harati B, Shahtaheri SJ, Karimi A, et al. Hematologic evaluation of painting hall workers in an automobile manufacturing company. *Shiraz E-Medical Journal*. 2017;18(12):1-7.
50. Haufroid V, Hotz P, Carbonnelle P, et al. Relationships between smoking habits, smoking-associated hematological changes, and urinary benzene metabolites. *J Toxicol Environ Health*. 1997;52(1):1-17.
51. Hristeva-Mirtcheva V. Changes in the peripheral blood of workers with occupational exposure to aromatic hydrocarbons. *Int Arch Occup Environ Health*. 1998;71 Suppl:S81-3.
52. Huang Z, Wang H, Huang H, et al. iTRAQ-based proteomic profiling of human serum reveals down-regulation of platelet basic protein and apolipoprotein B100 in patients with hematotoxicity induced by chronic occupational benzene exposure. *Toxicology*. 2012;291(1-3):56-64.
53. Huang J, Zhao M, Wang P, et al. Effects of low concentrations of benzene exposure on levels of platelet-associated antibodies and platelet parameters. *J Occup Environ Med*. 2014;56(10):e92-7.
54. Kamal A, Malik RN. Hematological Evidence of Occupational Exposure to Chemicals and Other Factors among Auto-Repair Workers in Rawalpindi, Pakistan. *Osong Public Health Res Perspect*. 2012;3(4):229-38.
55. Kasemy ZA, Kamel GM, Abdel-Rasoul GM, et al. Environmental and health effects of benzene exposure among Egyptian taxi drivers. *Journal of Environmental and Public Health*. 2019;2019:1-6.
56. Kipen HM, Cody RP, Crump KS, et al. Hematologic effects of benzene: a thirty-five year longitudinal study of rubber workers. *Toxicol Ind Health*. 1988;4(4):411-30.
57. Kirkeleit J, Ulvestad E, Riise T, et al. Acute suppression of serum IgM and IgA in tank workers exposed to benzene. *Scand J Immunol*. 2006;64(6):690-8.
58. Koh DH, Jeon HK, Lee SG, et al. The relationship between low-level benzene exposure and blood cell counts in Korean workers. *Occup Environ Med*. 2015;72(6):421-7.
59. Lan Q, Zhang L, Li G, et al. Hematotoxicity in workers exposed to low levels of benzene. *Science*. 2004;306(5702):1774-6.
60. Lan Q, Zhang L, Hakim F, et al. Lymphocyte toxicity and T cell receptor excision circles in workers exposed to benzene. *Chem Biol Interact*. 2005;153-154:111-5.

61. Li B, Li Y, Chen S, et al. The T-cell receptor V $\beta$  gene repertoire and clonal expansion from peripheral blood T cells in benzene-exposed workers in China. *Hematology*. 2009;14(2):106-10.
62. Li B, Niu Y, Liu S, et al. A change in CD3gamma, CD3delta, CD3, and CD3zeta gene expression in T-lymphocytes from benzene-exposed and benzene-poisoned workers. *J Immunotoxicol*. 2012;9(2):160-7.
63. Li J, Xing X, Zhang X, et al. Enhanced H3K4me3 modifications are involved in the transactivation of DNA damage responsive genes in workers exposed to low-level benzene. *Environ Pollut*. 2018;234:127-35.
64. Li X, Guo Y, Song X, et al. A cross-sectional survey based on blood VOCs, hematological parameters and urine indicators in a population in Jilin, Northeast China. *Environ Geochem Health*. 2019;41(3):1599-615.
65. Midzenski MA, McDiarmid MA, Rothman N, et al. Acute high dose exposure to benzene in shipyard workers. *Am J Ind Med*. 1992;22(4):553-65.
66. Moszczynski P, Rutowski J, Slowinski S. The effect of cigarettes smoking on the blood counts of T and NK cells in subjects with occupational exposure to organic solvents. *Cent Eur J Public Health*. 1996;4(3):164-8.
67. Moszczynski P, Lisiewicz J. Occupational exposure to benzene, toluene and xylene and the lymphocyte lysosomal N-acetyl-beta-D-glucosaminidase. *Ind Health*. 1985;23(1):47-51.
68. Pitarque M, Carbonell E, Lapena N, et al. No increase in micronuclei frequency in cultured blood lymphocytes from a group of filling station attendants. *Mutat Res*. 1996;367(3):161-7.
69. Renzetti G, Silvestre G, D'Amario C, et al. Less air pollution leads to rapid reduction of airway inflammation and improved airway function in asthmatic children. *Pediatrics*. 2009;123(3):1051-8.
70. Santiago F, Lima S, Pinheiro T, et al. Benzene poisoning, clinical and blood abnormalities in two Brazilian female gas station attendants: two case reports. *BMC Res Notes*. 2017;10(1):52.
71. Sauer E, Gauer B, Nascimento S, et al. The role of B7 costimulation in benzene immunotoxicity and its potential association with cancer risk. *Environ Res*. 2018;166:91-9.
72. Shen M, Zhang L, Bonner MR, et al. Association between mitochondrial DNA copy number, blood cell counts, and occupational benzene exposure. *Environ Mol Mutagen*. 2008;49(6):453-7.
73. Singh D, Hasan S, Siddiqui S, et al. Eosinophil count in petrol pump workers in and around the Muzaffarnagar city. *National Journal of Physiology, Pharmacy & Pharmacology*. 2014;4(2):118-20.
74. Smolik R, Grzybek-Hryniewicz K, Lange A, et al. Serum complement level in workers exposed to benzene, toluene and xylene. *Int Arch Arbeitsmed*. 1973;31(3):243-7.
75. Spatari G, Saitta S, Giorgianni C, et al. Interleukin-10 involvement in exposure to low dose of benzene. *Toxicol Ind Health*. 2015;31(4):351-4.
76. Sukaisi, Harahap U, Munir E. Measuring the amount of trans,trans-muconic acid in correlation with the CD4+ and CD8+ lymphocytes and their ratios caused by benzene exposure, and associated occupational health hazards. *IIOAB Journal*. 2017;8(3):13-7.
77. Sul D, Lee E, Lee MY, et al. DNA damage in lymphocytes of benzene exposed workers correlates with trans,trans-muconic acids and breath benzene levels. *Mutat Res*. 2005;582(1-2):61-70.
78. Swaen GM, van Amelsvoort L, Twisk JJ, et al. Low level occupational benzene exposure and hematological parameters. *Chem Biol Interact*. 2010;184(1-2):94-100.
79. Tsai SP, Fox EE, Ransdell JD, et al. A hematology surveillance study of petrochemical workers exposed to benzene. *Regul Toxicol Pharmacol*. 2004;40(1):67-73.
80. Tunsaringkarn T, Soogarun S, Palasuwan A. Occupational exposure to benzene and changes in hematological parameters and urinary trans, trans-muconic acid. *Int J Occup Environ Med*. 2013;4(1):45-9.
81. Uzma N, Kumar BS, Hazari MA. Exposure to benzene induces oxidative stress, alters the immune response and expression of p53 in gasoline filling workers. *Am J Ind Med*. 2010;53(12):1264-70.

82. Vermeulen R, Lan Q, Zhang L, et al. Decreased levels of CXC-chemokines in serum of benzene-exposed workers identified by array-based proteomics. *Proc Natl Acad Sci U S A*. 2005;102(47):17041-6.
83. Wang Q, Ye R, Ye YJ, et al. mRNA expression levels among cell regulatory and DNA damage genes in benzene-exposed workers in China. *J Occup Environ Med*. 2012;54(12):1467-70.
84. Wiwanitkit V, Suwansaksri J, Soogarun S. The urine trans, trans muconic acid biomarker and platelet count in a sample of subjects with benzene exposure. *Clin Appl Thromb Hemost*. 2004;10(1):73-6.
85. Wu T, Yuan Y, Wu Y, et al. Presence of antibodies to heat stress proteins in workers exposed to benzene and in patients with benzene poisoning. *Cell Stress Chaperones*. 1998;3(3):161-7.
86. Yaneva S, Zlatev Z, Totcheva T. Hematological changes in sailors from chemical cargo tankers. *Int Arch Occup Environ Health*. 1998;71 Suppl:S50-4.
87. Zamanian Z, Sedaghat Z, Mehrifar Y. Harmful Outcome of Occupational Exposure to Petrol: Assessment of Liver Function and Blood Parameters among Gas Station Workers in Kermanshah City, Iran. *Int J Prev Med*. 2018;9:100.
88. Guo X, Zhong W, Chen Y, et al. Benzene metabolites trigger pyroptosis and contribute to haematotoxicity via TET2 directly regulating the Aim2/Casp1 pathway. *EBioMedicine*. 2019;47:578-89.
89. Aksoy M, Dincol K, Akgun T, et al. Haematological effects of chronic benzene poisoning in 217 workers. *Br J Ind Med*. 1971;28(3):296-302.
90. Li P, Wu Y, Zhang Z, et al. Proteomics analysis identified serum biomarkers for occupational benzene exposure and chronic benzene poisoning. *Medicine (Baltimore)*. 2019;98(25):e16117.
91. Mukherjee AK, Chattopadhyay BP, Roy SK, et al. Work-exposure to PM10 and aromatic volatile organic compounds, excretion of urinary biomarkers and effect on the pulmonary function and heme-metabolism: A study of petrol pump workers and traffic police personnel in Kolkata City, India. *J Environ Sci Health A Tox Hazard Subst Environ Eng*. 2016;51(2):135-49.
92. Ren JC, Wang T, Wu H, et al. Promoter hypermethylation in CSF3R induces peripheral neutrophil reduction in benzene-exposure poisoning. *Environ Mol Mutagen*. 2020.
93. Vaughan Watson C, Naik S, Lewin M, et al. Associations between select blood VOCs and hematological measures in NHANES 2005-2010. *J Expo Sci Environ Epidemiol*. 2020.
94. McBride JA, Striker R. Imbalance in the game of T cells: What can the CD4/CD8 T-cell ratio tell us about HIV and health? *PLoS pathogens*. 2017;13(11):e1006624.
95. Stokes KY, Granger DN. Platelets: a critical link between inflammation and microvascular dysfunction. *The Journal of physiology*. 2012;590(5):1023-34.
96. Zucker-Franklin D, Seremetis S, Zheng ZY. Internalization of human immunodeficiency virus type I and other retroviruses by megakaryocytes and platelets. *Blood*. 1990;75(10):1920-3.
97. Youssefian T, Drouin A, Masse JM, et al. Host defense role of platelets: engulfment of HIV and Staphylococcus aureus occurs in a specific subcellular compartment and is enhanced by platelet activation. *Blood*. 2002;99(11):4021-9.
98. Anderson HL, Brodsky IE, Mangalmurti NS. The Evolving Erythrocyte: Red Blood Cells as Modulators of Innate Immunity. *Journal of immunology*. 2018;201(5):1343-51.
99. Karsten E, Herbert B. The emerging role of red blood cells in cytokine signalling and modulating immune cells. *Blood Reviews*. 2019.
